# Supplementary material
Source: PubMed Central journal article supplement (PMC5164931)
Supplement: NIHMS70377-supplement-Supplementary_figures.pdf [file NIHMS70377-supplement-Supplementary_figures.pdf]

Supplementary Figure 1

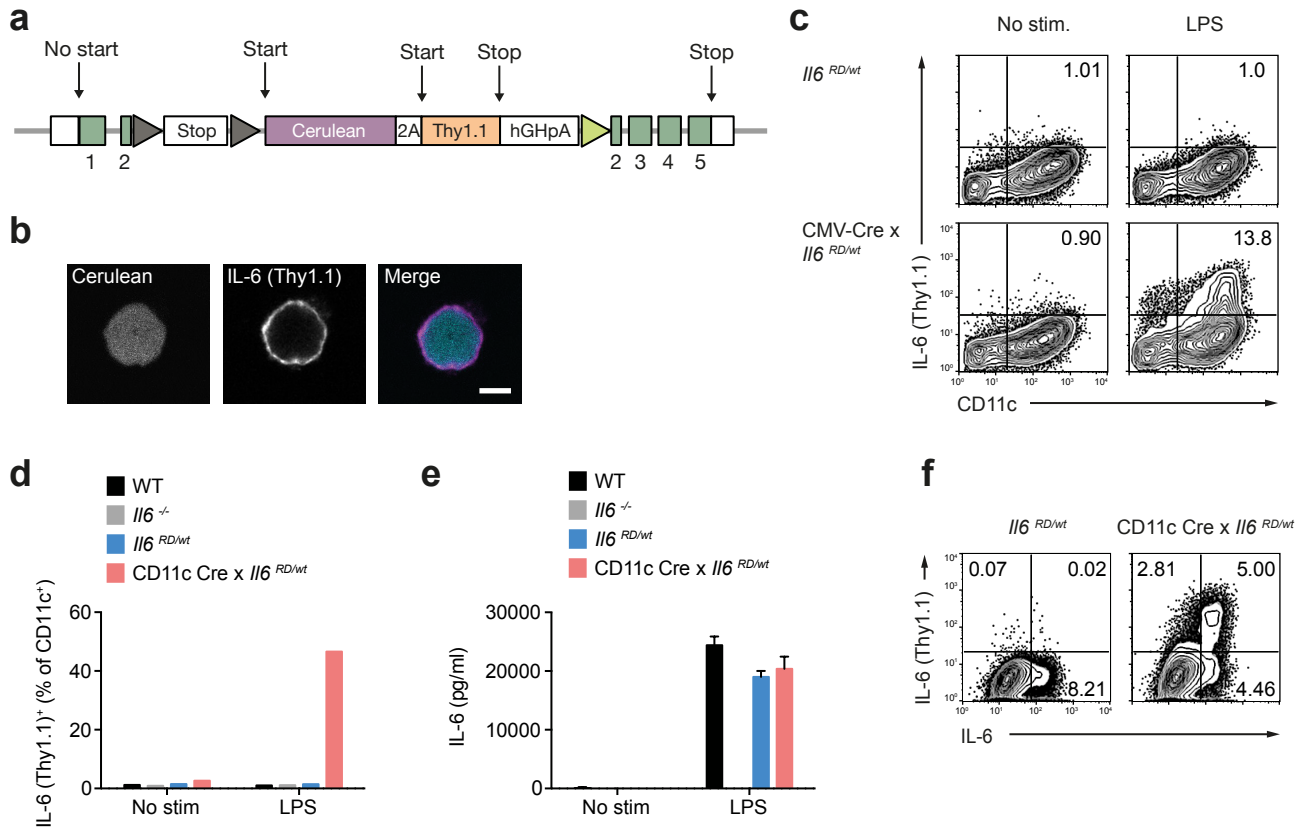

Supplementary Figure 1. IL-6 reporter mice.

(a) Targeted *Il6* locus. The reporter cassette including a floxed stop cassette was introduced into exon 2 of the *Il6* locus. Since the locus is disrupted by this knock-in construct, IL-6 reporter mice were bred heterozygously and compared with *Il6*<sup>+/-</sup> mice since *Il6* produces a gene dose effect (data not shown). (b) Bone marrow derived dendritic cells (BMDCs) were prepared from CMV Cre x *Il6*<sup>RD/wt</sup> mice and stimulated *in vitro* with CpG. Cerulean was expressed in the cytoplasm (left) and Thy1.1 at the cell surface (middle, merge right) as expected. Confocal microphotographs, Scale bar 10  $\mu$ m. (c) *Il6*<sup>RD/wt</sup> control BMDCs or BMDCs prepared from IL-6 reporter mice (CMV Cre x *Il6*<sup>RD/wt</sup>) were stimulated with LPS followed by flow cytometric assessment of Thy1.1 expression. (d-f) Correlation of Thy1.1 expression and IL-6 expression in BMDCs. BMDCs were prepared from different mouse strains as indicated and stimulated with LPS followed by analysis of Thy1.1 expression (d) and IL-6 production as measured by ELISA (e). (f) Co-expression of IL-6 and Thy1.1. Control BMDCs (*Il6*<sup>RD/wt</sup>) and IL-6 reporter BMDCs (CD11c Cre x *Il6*<sup>RD/wt</sup>) were stimulated with CpG for 6 h in the presence of Brefeldin A for the last 2 h followed by combined surface staining for Thy1.1 and intracellular staining for IL-6.

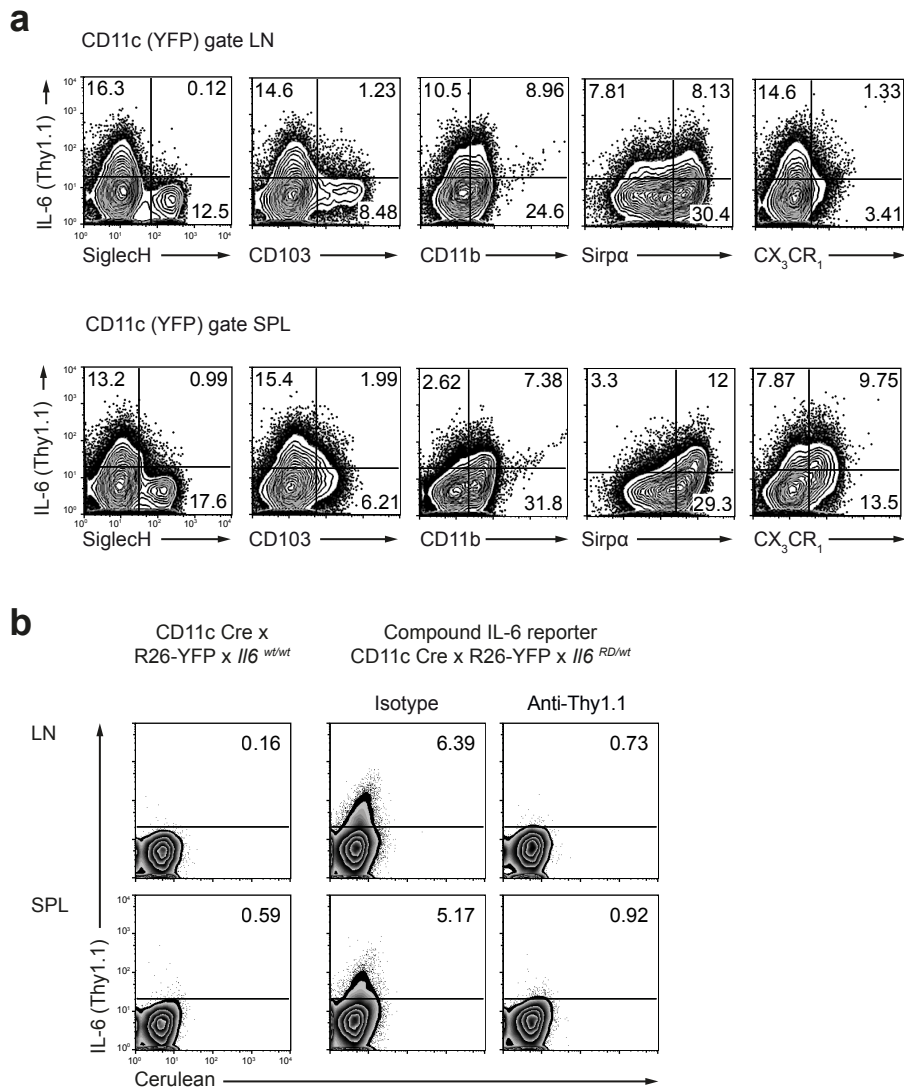

**Supplementary Figure 2. Characterization of IL-6 (Thy1.1) expressing DCs *in vivo*.**

(a) *Il6*<sup>RD/wt</sup> mice were crossed to CD11c Cre and R26 *Stop*<sup>fllox/fllox</sup> YFP mice to generate compound heterozygous mice with DC conditional expression of an IL-6 reporter allele and YFP. In order to visualize large amounts of IL-6 producing DCs *ex vivo*, we injected Flt3L producing melanoma cells *s.c.* to expand DCs *in vivo* and 6 days later, treated the animals with LPS (3mg/kg LPS [E. coli 0111:B4]) *i.p.* to stimulate IL-6 production. Two days after LPS injection, lymph nodes (LN) and spleen (SPL) were prepared and stained for Thy1.1 to visualize IL-6<sup>+</sup> DCs by flow cytometry directly *ex vivo*. In order to analyze whether Thy1.1 (IL-6)<sup>+</sup> DCs segregate into a specific DC subset, the indicated surface molecules were co-stained. (b) IL-6 Reporter mice allow for IL-6 conditional deletion of DCs *in vivo*. CD11c Cre x *Il6*<sup>RD/wt</sup> x R26 *Stop*<sup>fllox/fllox</sup> YFP mice were treated with Flt3L producing melanoma cells and LPS. The mice were then assigned to treatment with either Isotype (mouse IgG2a, C1.18.4) or anti-Thy1.1 (19E12) in order to deplete IL-6<sup>+</sup> DCs. One day later, lymph nodes (LN) and spleen (SPL) were prepared and stained for Thy1.1 (OX-7) to visualize IL-6<sup>+</sup> DCs by flow cytometry directly *ex vivo*. CD11c Cre x R26 *Stop*<sup>fllox/fllox</sup> YFP x *Il6*<sup>wt/wt</sup> mice that were treated identically as the DC conditional IL-6 reporter mice are shown as a "negative" staining control for Thy1.1 (left).

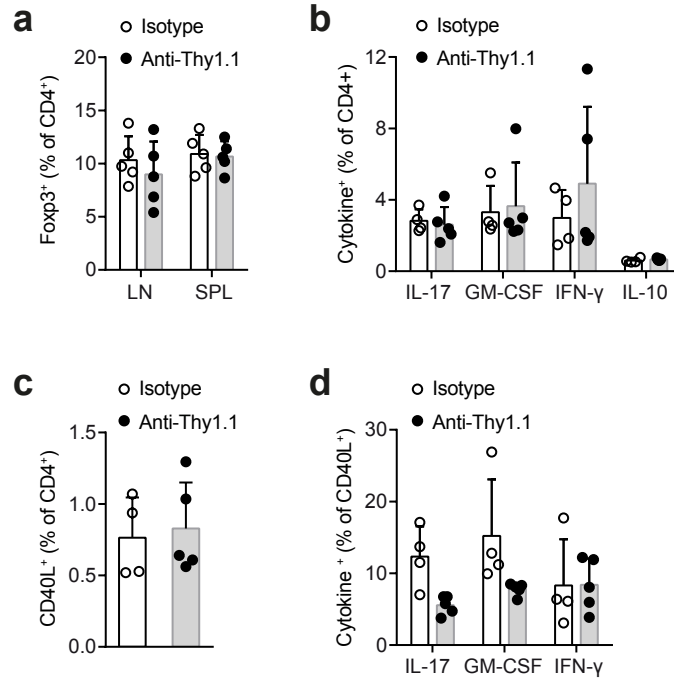

**Supplementary Figure 3. *In vivo* priming of T cell responses in the absence of IL-6 producing DCs.**

DC conditional IL-6 reporter mice (CD11c Cre x *Il6<sup>RD/Mt</sup>*) were immunized with MOG<sub>35-55</sub> in CFA followed by control treatment (mouse IgG2a isotype) or anti-Thy1.1 (19E12) to deplete IL-6 (Thy1.1)<sup>+</sup> DCs. Antibody treatment was performed by *i.p.* injection of 200  $\mu$ g antibody every other day starting on day 1 after immunization. On day 7 after immunization, draining lymph nodes (LN) and spleen (SPL) were prepared and stained for Foxp3 to quantify the fraction of Tregs in the CD4<sup>+</sup> T cell compartment (**a**). (**b**) Subsequent to PMA/ionomycin restimulation, LN CD4<sup>+</sup> T cells were stained intracellularly for IL-17, GM-CSF, IFN- $\gamma$ , and IL-10. (**c**, **d**) Antigen specific T cell responses were assessed by intracellular staining of CD40L (CD154) and cytokines in splenic CD4<sup>+</sup> T cells of control treated or IL-6<sup>+</sup> DC depleted mice after recall with MOG<sub>35-55</sub>. Mean  $\pm$  SD (n=5 mice per genotype).

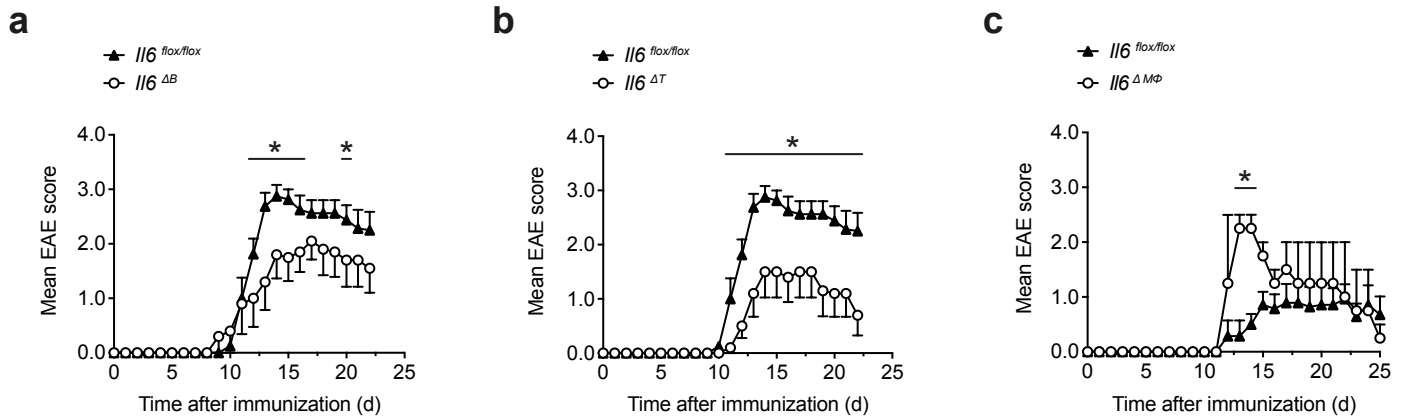

**Supplementary Figure 4. Ablation of *Il6* in B cells, T cells, or macrophages does not result in resistance to MOG<sub>35-55</sub> induced EAE.**

Course of MOG<sub>35-55</sub> induced EAE in mouse strains with conditional ablation of *Il6* in B cells (**a**), T cells (**b**), and LysM<sup>+</sup> myeloid cells (**c**). Mice were subcutaneously immunized with MOG<sub>35-55</sub> in CFA and i.v. injected with pertussis toxin on days 0 and 2. Mean clinical EAE score and SEM,  $n \geq 4$  per group. \* $P < 0.05$ , ANOVA plus Fisher's LSD test for individual days.

## Supplementary Figure 5

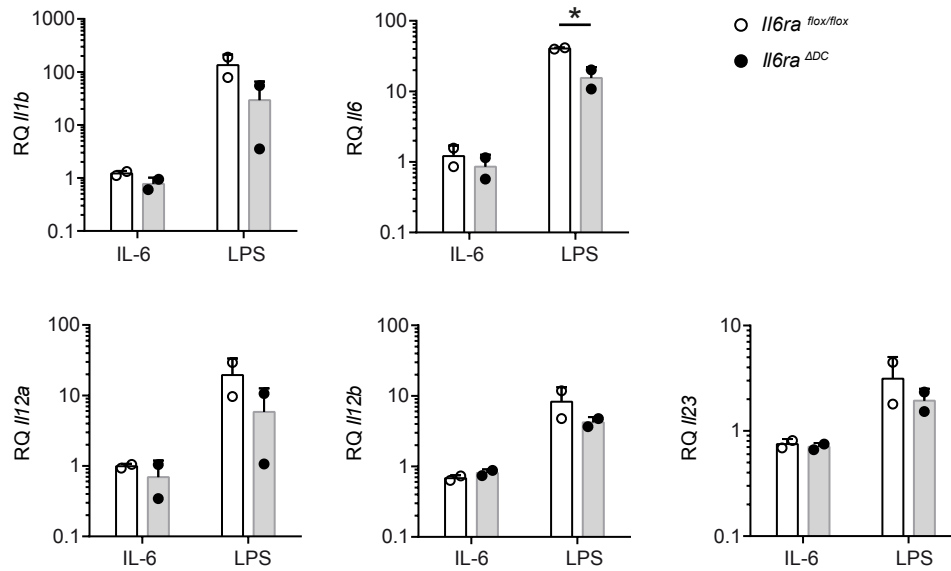

**Supplementary Figure 5. *Il6ra*<sup>-/-</sup> BMDCs are not deficient in the production of pro-inflammatory cytokines in response to LPS stimulation.**

Control *Il6ra<sup>flox/flox</sup>* or IL-6Rα deficient BMDCs (*Il6ra<sup>ΔDC</sup>*) were stimulated over night with either IL-6 or LPS followed by analysis of *Il1b*, *Il6*, *Il12a*, *Il12b*, and *Il23* mRNA production by quantitative RT PCR. Mean + SD of technical replicates. One out of two independent experiments. \*P<0.05, ANOVA plus Sidak's multiple comparisons test.

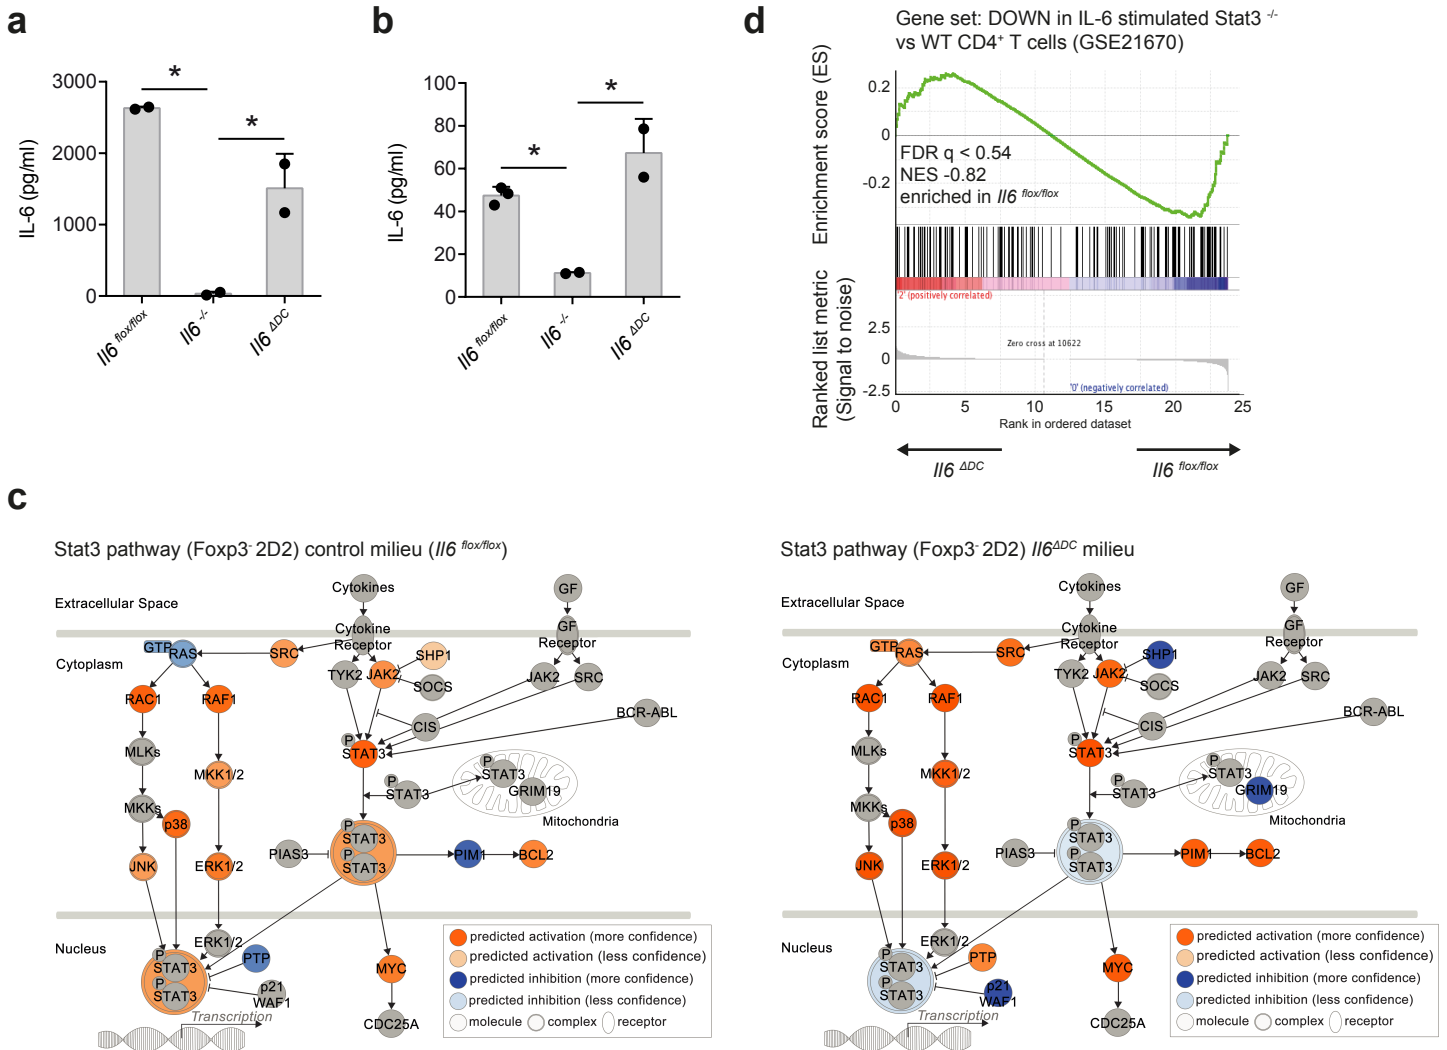

**Supplementary Figure 6. DC derived IL-6 is required for robust Stat3 activation in T cells.**

Subcutaneous immunization with a peptide antigen in CFA induces similar amounts of serum IL-6 in control mice (*I16<sup>fllox/fllox</sup>*) and *I16<sup>ΔDC</sup>* mice. Control animals (*I16<sup>fllox/fllox</sup>*), *I16<sup>-/-</sup>* mice, and *I16<sup>ΔDC</sup>* mice were either injected with LPS (a) to induce systemic IL-6 or immunized subcutaneously with MOG<sub>35-55</sub> in CFA (b). Serum samples were collected 5 h after LPS injection or 1 day after subcutaneous immunization for the assessment of IL-6 by ELISA (n=3, SD, \*P<0.04, One-way-ANOVA plus Tukey's multiple comparisons test). (c, d) RNA Seq analysis was performed in 2D2 T cells re-isolated from draining lymph nodes of control hosts (*I16<sup>fllox/fllox</sup>*) or *I16<sup>ΔDC</sup>* hosts after immunization with cognate MOG peptide. (c) Ingenuity pathway analysis was performed to evaluate the strength of Stat3 pathway activation in control primed (left panel) or *I16<sup>ΔDC</sup>* primed (right panel) 2D2 effector T cells. (d) Notably, in contrast to T cells primed in a control milieu, *I16<sup>ΔDC</sup>* primed T cells exhibited a weakened "Stat3" signature when their RNA profile was directly tested for the enrichment of Stat3 dependent genes by GSEA (see also Supplementary Tables).

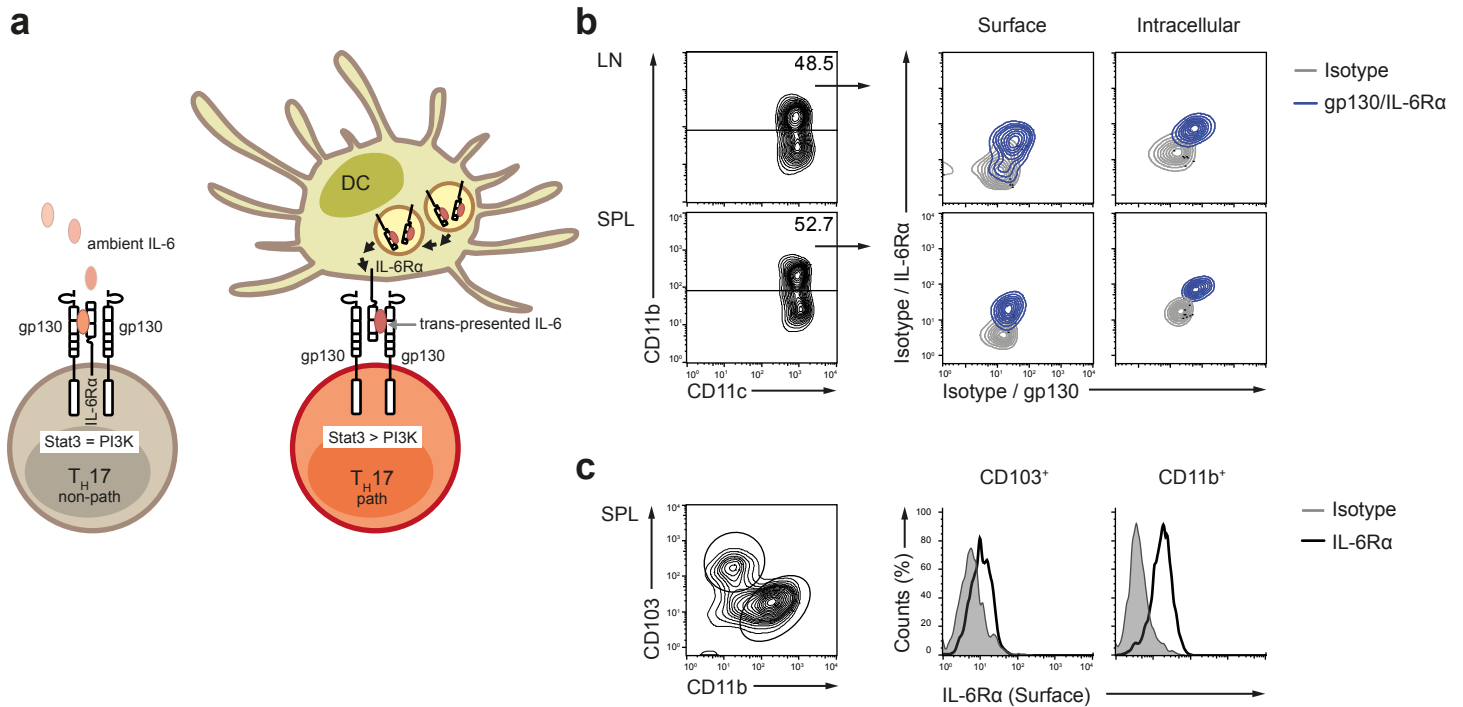

**Supplementary Figure 7. IL-6 cluster signaling and surface and intracellular expression of IL-6R $\alpha$  and gp130 by cDC2.**

(a) Scheme of IL-6 cluster signaling. IL-6 is loaded onto the IL-6R $\alpha$  in intracellular compartments of DCs and is brought to the cell membrane as an IL-6-IL-6R $\alpha$  complex. During a cognate interaction between DCs and T cells, DCs present IL-6 via their IL-6R $\alpha$  *in trans* to T cells. Trans-presentation of IL-6 leads to the engagement of gp130 on the T cell side and induces a pathogenic phenotype in sensitized T cells. (b) cDC2 express IL-6R $\alpha$  on their cell surface. WT mice were immunized with MOG<sub>35-55</sub> in CFA and on day 7 after immunization, cells from draining lymph nodes (LN) and spleen (SPL) were analyzed by flow cytometry. (b) IL-6R $\alpha$  and gp130 expression was assessed in CD11c<sup>+</sup>MHC class II<sup>+</sup>CD11b<sup>+</sup> cDC2 either by surface staining (left column) or by intracellular staining (right column). Grey: isotype. Blue overlay: IL-6R $\alpha$  or gp130, respectively. (c) Surface expression of IL-6R $\alpha$  was assessed on splenic cDC1 cells (CD103<sup>+</sup>) or cDC2 cells (CD11b<sup>+</sup>) isolated from immunized mice on day 7 after immunization.

## Supplementary Figure 8

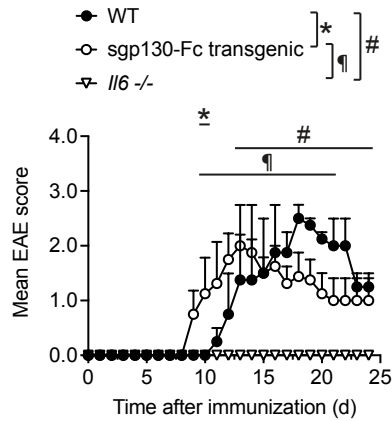

**Supplementary Figure 8. IL-6 trans-signaling by the soluble IL-6/IL-6R $\alpha$  complex is irrelevant during MOG<sub>35-55</sub> induced EAE.**

WT mice, opt\_sgp130-Fc transgenic mice, and *Il6*<sup>-/-</sup> mice were immunized with MOG<sub>35-55</sub> in CFA. Opt\_sgp130-Fc transgenic mice produce large amounts of sgp130, which blocks endogenous IL-6 trans-signaling *in vivo*. Mean EAE scores + SEM, \*P<0.04, ANOVA plus Tukey post test.



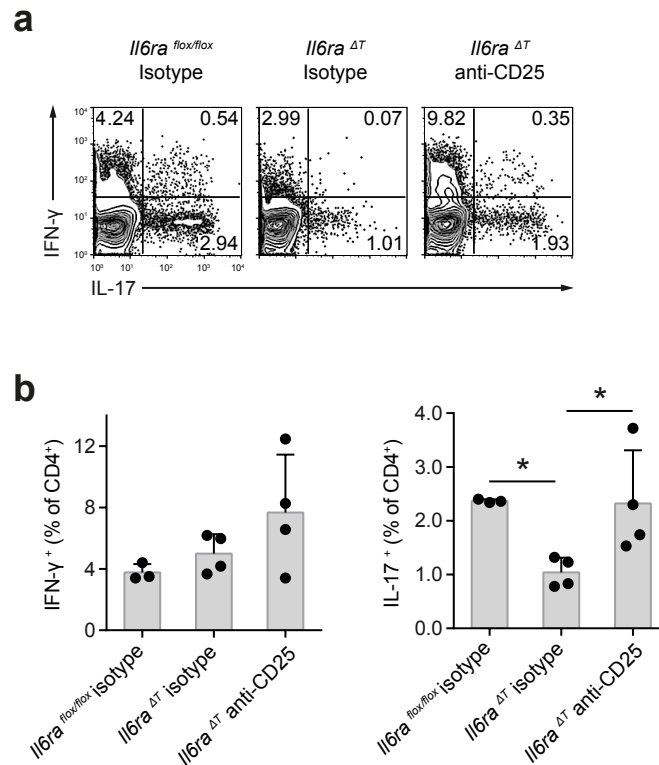

### Supplementary Figure 9. IL-6R $\alpha$ deficient T cells differentiate into pathogenic T<sub>H</sub>17 cells.

*Il6ra*<sup>flox/flox</sup> control mice and Treg sufficient or deficient (anti-CD25 treated) *Il6ra* <sup>$\Delta T$</sup>  animals were immunized with MOG<sub>35-55</sub> in CFA. After priming of antigen specific T cells *in vivo*, the cytokine response was assessed in CD4<sup>+</sup> T cells isolated from the spleen on day 10 after immunization after short term *ex vivo* restimulation with PMA/ionomycin and intracellular cytokine staining. (a) Representative cytograms of the CD4<sup>+</sup> T cell gate. (b) Frequency of IFN- $\gamma$  producing CD4<sup>+</sup> T cells (left) and IL-17 producing CD4<sup>+</sup> T cells (right); n=3 (Ctrl), n=4 (isotype treated *Il6ra* <sup>$\Delta T$</sup> ) and n=4 (anti-CD25 treated *Il6ra* <sup>$\Delta T$</sup> ). ANOVA, Fisher's LSD post-test, \*P<0.03.

**a**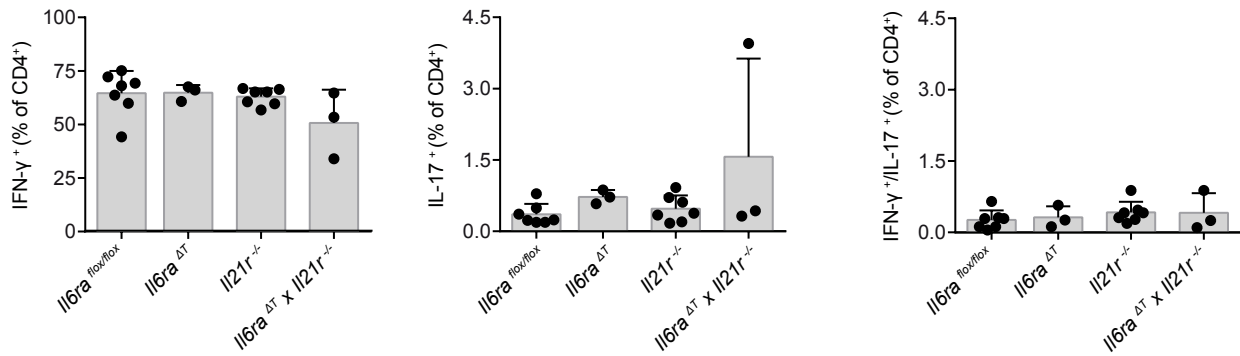**b**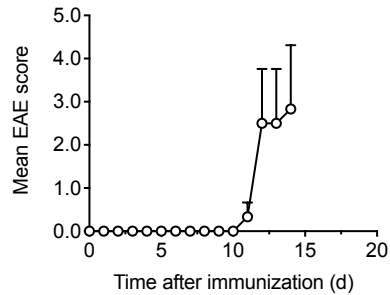

**Supplementary Figure 10. IL-6 cluster signaling is sufficient to induce pathogenic T<sub>H</sub>17 cells in the simultaneous absence of classic IL-6 signaling and the IL-21 mediated alternative pathway to induce T<sub>H</sub>17 cells.**

Naive CD4<sup>+</sup> T cells were purified from *Il6ra<sup>fllox/fllox</sup>* control mice, *Il6ra <sup>$\Delta T$</sup>*  mice, *Il21r<sup>-/-</sup>* mice, or *Il6ra <sup>$\Delta T$</sup>  x Il21r<sup>-/-</sup>* mice and transferred into *Rag1<sup>-/-</sup>* host animals followed by immunization with MOG<sub>35-55</sub> in CFA. (a) Intracellular cytokine staining of T cells re-isolated from the spleen on day 14 after immunization and subjected to *ex vivo* stimulation with PMA/ionomycin. (b) Clinical course of EAE in *Rag1<sup>-/-</sup>* recipients of T cells deficient in both, IL-6R $\alpha$  and IL-21R. Mean clinical score + SEM, n=3.
