# Supplementary material
Source: PubMed Central journal article supplement (PMC5164931)
Supplement: NIHMS70377-supplement-Supplementary_tables.pdf [file NIHMS70377-supplement-Supplementary_tables.pdf]

**Supplementary Table 1**

**Differentially expressed genes in Foxp3<sup>+</sup> 2D2 indicator T cells re-isolated from draining lymph nodes after priming (day 7) in *Il6<sup>flox/flox</sup>* (control) hosts or global *Il6<sup>-/-</sup>* host mice.**

The cDNA library was prepared according to a “not so random priming” protocol. RNA Seq was performed according to a 100 base single read protocol with  $20 \times 10^6$  reads per sample.

**Supplementary Table 1**

|               | baseMean    | log2FoldChange | lfcSE       | stat         | pvalue      | padj        |
|---------------|-------------|----------------|-------------|--------------|-------------|-------------|
| Coro2a        | 41.09379591 | -1.974229751   | 0.345810714 | -5.708989553 | 1.14E-08    | 8.55E-06    |
| Ly6c2         | 58.1798293  | -1.605767354   | 0.363472142 | -4.417855366 | 9.97E-06    | 0.00121212  |
| Oas2          | 97.88082994 | -1.491378761   | 0.184905621 | -8.065621552 | 7.29E-16    | 7.00E-12    |
| Cpd           | 28.59796683 | -1.45941277    | 0.335869257 | -4.34518116  | 1.39E-05    | 0.00157268  |
| Il18rap       | 81.66568121 | -1.440957795   | 0.322697219 | -4.465355483 | 7.99E-06    | 0.001094589 |
| Ifit3         | 79.0871399  | -1.398780739   | 0.252179736 | -5.546761047 | 2.91E-08    | 1.69E-05    |
| Rora          | 79.21312165 | -1.365192792   | 0.306111978 | -4.459782336 | 8.20E-06    | 0.001094589 |
| Ifng          | 20.14568621 | -1.294543379   | 0.36549599  | -3.541881214 | 0.000397284 | 0.016811953 |
| Il18r1        | 143.0100222 | -1.272715985   | 0.310920203 | -4.093384641 | 4.25E-05    | 0.003403099 |
| Rsad2         | 73.60162231 | -1.258764673   | 0.264679162 | -4.755813278 | 1.98E-06    | 0.000395545 |
| Tbx21         | 45.02712594 | -1.245263204   | 0.338305162 | -3.680887385 | 0.000232424 | 0.011641708 |
| Sdc3          | 24.99970983 | -1.183508702   | 0.330650024 | -3.579339536 | 0.000344464 | 0.015178524 |
| Ctsw          | 31.60942497 | -1.182895898   | 0.341183518 | -3.467037048 | 0.000526229 | 0.020548615 |
| Cd86          | 20.59044235 | -1.179643804   | 0.339023736 | -3.479531608 | 0.000502291 | 0.019939158 |
| Crmp1         | 49.5785402  | -1.173065612   | 0.304012685 | -3.858607447 | 0.000114035 | 0.006761849 |
| Myo1f         | 183.5500988 | -1.170321599   | 0.284311528 | -4.116335375 | 3.85E-05    | 0.003160489 |
| Dock5         | 76.46496337 | -1.14788549    | 0.234362595 | -4.897903987 | 9.69E-07    | 0.000258466 |
| B3gnt5        | 21.75518305 | -1.147496575   | 0.353482994 | -3.246256803 | 0.001169333 | 0.035434112 |
| Dgkh          | 32.7597235  | -1.139834392   | 0.273735405 | -4.164000608 | 3.13E-05    | 0.002718866 |
| Syt12         | 146.8773738 | -1.13295712    | 0.185629896 | -6.103311734 | 1.04E-09    | 1.25E-06    |
| Osbpl3        | 80.86769382 | -1.130148603   | 0.302562891 | -3.735251865 | 0.000187527 | 0.010063622 |
| Cenpf         | 395.9088717 | -1.09291446    | 0.299870672 | -3.644619376 | 0.000267788 | 0.012656274 |
| Kif2c         | 120.7356667 | -1.084346289   | 0.24563354  | -4.414487897 | 1.01E-05    | 0.001215752 |
| Espl1         | 213.60905   | -1.076518296   | 0.262702709 | -4.097857617 | 4.17E-05    | 0.003390372 |
| Usp18         | 95.77512899 | -1.071373101   | 0.21230518  | -5.046382285 | 4.50E-07    | 0.000135161 |
| Asap2         | 18.26046513 | -1.066076329   | 0.305256103 | -3.492399714 | 0.000478701 | 0.019321029 |
| Wdfy4         | 32.40731446 | -1.055467652   | 0.304897554 | -3.461712422 | 0.00053675  | 0.020863739 |
| Cdca3         | 168.5708068 | -1.052119479   | 0.215194154 | -4.889163852 | 1.01E-06    | 0.000262906 |
| Cacna1i       | 24.41052872 | -1.047545243   | 0.287832344 | -3.639428523 | 0.000273244 | 0.012680095 |
| Ifit1         | 252.5239302 | -1.042401746   | 0.223926965 | -4.655097017 | 3.24E-06    | 0.00057999  |
| Sapcd2        | 44.96589317 | -1.041365152   | 0.285925528 | -3.642085265 | 0.000270438 | 0.012656274 |
| Ggt1          | 65.21435014 | -1.040494228   | 0.30639237  | -3.395953454 | 0.0006839   | 0.024386632 |
| Atp8b4        | 190.1136166 | -1.038495762   | 0.254958348 | -4.073197727 | 4.64E-05    | 0.003651227 |
| Mx2           | 32.994896   | -1.037997062   | 0.255119431 | -4.068671121 | 4.73E-05    | 0.003692611 |
| Mx1           | 87.87216153 | -1.031810545   | 0.194722818 | -5.298868192 | 1.17E-07    | 5.09E-05    |
| Myo5a         | 114.5658273 | -1.027422265   | 0.206747432 | -4.96945599  | 6.71E-07    | 0.000195441 |
| Ska3          | 56.61437619 | -1.022790699   | 0.305840356 | -3.344197971 | 0.000825208 | 0.027911798 |
| I830012O16Rik | 26.21428716 | -1.018367312   | 0.282547704 | -3.604231419 | 0.000313078 | 0.014053399 |
| Aspm          | 392.7901592 | -1.013593102   | 0.251501983 | -4.030159485 | 5.57E-05    | 0.003966141 |
| Cit           | 254.7027081 | -1.010333026   | 0.225097379 | -4.48842644  | 7.18E-06    | 0.001044306 |
| Depdc1b       | 60.3106289  | -1.00418232    | 0.317591828 | -3.161864485 | 0.001567625 | 0.043344001 |
| Gpsm2         | 74.44222664 | -1.002311459   | 0.234293405 | -4.278018242 | 1.89E-05    | 0.001946559 |
| Mki67         | 4365.57728  | -1.001670594   | 0.223766503 | -4.476409928 | 7.59E-06    | 0.001088326 |

|               |             |              |             |              |             |             |
|---------------|-------------|--------------|-------------|--------------|-------------|-------------|
| Gm14446       | 104.9677791 | -1.001513224 | 0.263565798 | -3.799860346 | 0.000144778 | 0.008229196 |
| 1700025G04Rik | 33.40726437 | -0.997288177 | 0.243467169 | -4.096191609 | 4.20E-05    | 0.003390372 |
| Plk1          | 179.3514015 | -0.973258626 | 0.312952078 | -3.109928628 | 0.001871326 | 0.047935875 |
| Hist1h3i      | 136.5846228 | -0.971224317 | 0.217249912 | -4.470539512 | 7.80E-06    | 0.001094589 |
| Mastl         | 57.12492115 | -0.96933526  | 0.30802237  | -3.146963837 | 0.001649754 | 0.04464094  |
| Cdca8         | 187.5127326 | -0.967287518 | 0.186488395 | -5.186851008 | 2.14E-07    | 8.93E-05    |
| Hist1h3f      | 505.4267403 | -0.963838023 | 0.294644729 | -3.271187054 | 0.00107097  | 0.033401761 |
| Anln          | 110.621535  | -0.94982366  | 0.265004152 | -3.584184064 | 0.000338134 | 0.014987925 |
| Endod1        | 126.0875267 | -0.948184748 | 0.234723434 | -4.0395828   | 5.35E-05    | 0.003906384 |
| Arsb          | 73.6849532  | -0.944711551 | 0.305146615 | -3.095926693 | 0.001961989 | 0.048879147 |
| Hist1h3a      | 598.2631751 | -0.940638988 | 0.269023364 | -3.496495519 | 0.000471412 | 0.019188083 |
| Slfn3         | 59.99790606 | -0.93281559  | 0.276360593 | -3.37535674  | 0.000737201 | 0.02556516  |
| Arhgap19      | 182.2154804 | -0.929230978 | 0.255192261 | -3.641297645 | 0.000271267 | 0.012656274 |
| Kif4          | 219.6306403 | -0.923672579 | 0.285781878 | -3.232089405 | 0.001228886 | 0.036703134 |
| Ccnb1         | 137.8143245 | -0.921877759 | 0.293129977 | -3.144945357 | 0.001661179 | 0.044698266 |
| Kif14         | 178.6856973 | -0.919422817 | 0.262851904 | -3.497873908 | 0.000468983 | 0.01917042  |
| Cdk1          | 172.1368787 | -0.908902399 | 0.27712619  | -3.279741974 | 0.001039021 | 0.03275101  |
| Cenpe         | 502.2244688 | -0.906668628 | 0.263735427 | -3.437796121 | 0.000586469 | 0.021943499 |
| Cmpk2         | 90.5203843  | -0.904989535 | 0.176219045 | -5.13559438  | 2.81E-07    | 0.000101841 |
| Sep 11        | 451.1268969 | -0.904004497 | 0.185215806 | -4.880817214 | 1.06E-06    | 0.000267065 |
| Hmmr          | 234.2776797 | -0.90110499  | 0.271367759 | -3.320604456 | 0.000898227 | 0.029753008 |
| Aurka         | 91.73421051 | -0.90041677  | 0.275937191 | -3.26312218  | 0.00110192  | 0.034255805 |
| Top2a         | 2114.257327 | -0.895149348 | 0.271475391 | -3.297349873 | 0.000976018 | 0.031567786 |
| Cenpi         | 54.63392424 | -0.894152188 | 0.272763799 | -3.278118986 | 0.001045013 | 0.03275101  |
| Kif11         | 593.3311384 | -0.893526302 | 0.288800694 | -3.093920208 | 0.001975306 | 0.049030465 |
| Bub1          | 131.2828462 | -0.893099491 | 0.287802402 | -3.103168995 | 0.001914603 | 0.048526845 |
| Foxm1         | 251.2712696 | -0.88981407  | 0.237257469 | -3.750415418 | 0.000176542 | 0.009527309 |
| Rtp4          | 203.3333926 | -0.884745483 | 0.23585483  | -3.75122902  | 0.00017597  | 0.009527309 |
| Melk          | 97.71638436 | -0.88364074  | 0.182694597 | -4.836709752 | 1.32E-06    | 0.000317012 |
| Kif18b        | 162.4983677 | -0.882104615 | 0.281593549 | -3.132545536 | 0.001732975 | 0.045690671 |
| Hist1h1b      | 415.3028503 | -0.881610206 | 0.272795926 | -3.231757231 | 0.001230315 | 0.036703134 |
| Ddx60         | 132.0067378 | -0.87838201  | 0.170190104 | -5.161181456 | 2.45E-07    | 9.43E-05    |
| Ncapg         | 250.8240333 | -0.869032584 | 0.266871924 | -3.256365714 | 0.001128483 | 0.034744254 |
| Tacc3         | 294.6711415 | -0.85881999  | 0.272582208 | -3.150682487 | 0.001628895 | 0.044201022 |
| Gpr55         | 50.56541308 | -0.849983648 | 0.269114206 | -3.158449569 | 0.001586107 | 0.043407831 |
| Spag5         | 204.9728686 | -0.845205786 | 0.24458865  | -3.455621458 | 0.000549026 | 0.021095766 |
| Ttn           | 64.97522841 | -0.844905369 | 0.236768749 | -3.568483484 | 0.000359053 | 0.015556559 |
| Gbp7          | 670.331953  | -0.842981413 | 0.199110619 | -4.233734077 | 2.30E-05    | 0.002186009 |
| Racgap1       | 380.062155  | -0.841068002 | 0.207903388 | -4.045475219 | 5.22E-05    | 0.003858441 |
| Cdc20         | 149.880122  | -0.838601348 | 0.218826368 | -3.832268282 | 0.000126967 | 0.007378384 |
| Bub1b         | 323.2875842 | -0.836218836 | 0.258475011 | -3.235201859 | 0.001215568 | 0.03648982  |
| Rad51ap1      | 57.46781384 | -0.83585738  | 0.240500535 | -3.475490724 | 0.00050992  | 0.020074951 |
| Gbp10         | 64.9755317  | -0.835499492 | 0.264326043 | -3.160867091 | 0.001573003 | 0.043344001 |
| Rap1gap2      | 149.3121581 | -0.834273443 | 0.206164865 | -4.046632507 | 5.20E-05    | 0.003858441 |
| Kif18a        | 71.78467837 | -0.833473811 | 0.267231641 | -3.118918887 | 0.001815159 | 0.046725298 |
| Cdca2         | 130.6959396 | -0.819529247 | 0.226038842 | -3.625612475 | 0.000288277 | 0.013124136 |

|                |             |              |             |              |             |             |
|----------------|-------------|--------------|-------------|--------------|-------------|-------------|
| Tpx2           | 435.5736016 | -0.809516596 | 0.249278957 | -3.247432538 | 0.001164513 | 0.035399711 |
| Crybg3         | 46.73606102 | -0.80291737  | 0.258276626 | -3.108749646 | 0.001878808 | 0.047999559 |
| Phf11c         | 76.05290523 | -0.798956423 | 0.197258857 | -4.05029429  | 5.12E-05    | 0.003858441 |
| Spdl1          | 77.7215467  | -0.79594     | 0.248416945 | -3.204048746 | 0.001355095 | 0.039565488 |
| Kif20b         | 245.9741172 | -0.79281791  | 0.22785288  | -3.479516734 | 0.000502319 | 0.019939158 |
| Mybl2          | 74.7795021  | -0.786892312 | 0.247474597 | -3.179689234 | 0.001474331 | 0.041900653 |
| 9930111J21Rik1 | 120.7032166 | -0.78122658  | 0.182265668 | -4.286197118 | 1.82E-05    | 0.001939961 |
| Vim            | 3450.65694  | -0.778212038 | 0.19196016  | -4.054028905 | 5.03E-05    | 0.003838054 |
| Pglyrp1        | 67.37912722 | -0.7731176   | 0.182368271 | -4.239320784 | 2.24E-05    | 0.002175391 |
| Fbln1          | 44.98793986 | -0.757532962 | 0.234023218 | -3.236999175 | 0.001207938 | 0.036374447 |
| Sorl1          | 281.8840233 | -0.752910655 | 0.192912748 | -3.902855899 | 9.51E-05    | 0.00592979  |
| E2f8           | 226.6561092 | -0.745007708 | 0.231164775 | -3.222842703 | 0.001269252 | 0.037515193 |
| Dpp4           | 226.2845026 | -0.732618331 | 0.217720877 | -3.364942958 | 0.000765595 | 0.026171901 |
| Ticrr          | 160.4266448 | -0.73227619  | 0.210044299 | -3.486294057 | 0.000489762 | 0.019684757 |
| Ncapg2         | 350.1747456 | -0.731564134 | 0.228437391 | -3.202471054 | 0.00136254  | 0.039662299 |
| Cep55          | 191.0191194 | -0.727337621 | 0.213602589 | -3.405097412 | 0.000661405 | 0.023795701 |
| Pik3r5         | 319.9765204 | -0.721380526 | 0.196066101 | -3.679272048 | 0.000233901 | 0.011641708 |
| Gbp6           | 267.9295725 | -0.720973331 | 0.196882022 | -3.661956154 | 0.000250297 | 0.012143183 |
| Nlrc5          | 1229.319525 | -0.716642686 | 0.167605699 | -4.275765633 | 1.90E-05    | 0.001946559 |
| Lmnb1          | 1084.794164 | -0.715366561 | 0.177762285 | -4.024287616 | 5.71E-05    | 0.004007037 |
| Chtf18         | 78.55893851 | -0.699569314 | 0.18060772  | -3.873418675 | 0.000107319 | 0.006483701 |
| Gbp3           | 101.393884  | -0.687197684 | 0.199024892 | -3.452822795 | 0.000554753 | 0.021146668 |
| Qpct           | 81.00059929 | -0.687195472 | 0.18757127  | -3.663649934 | 0.000248647 | 0.012130982 |
| Slc4a7         | 199.4693706 | -0.684430678 | 0.163405003 | -4.188554001 | 2.81E-05    | 0.002521182 |
| Gm12250        | 190.694381  | -0.681068534 | 0.209395348 | -3.252548539 | 0.001143751 | 0.034990026 |
| Slfm5          | 917.7922773 | -0.679550025 | 0.096846041 | -7.016807443 | 2.27E-12    | 5.45E-09    |
| Ifih1          | 286.9101011 | -0.676549383 | 0.171625732 | -3.942004351 | 8.08E-05    | 0.005244585 |
| Pydc4          | 228.0374888 | -0.673523221 | 0.171969007 | -3.916538398 | 8.98E-05    | 0.005714585 |
| Samd9l         | 590.2602349 | -0.673454835 | 0.122339759 | -5.504791253 | 3.70E-08    | 1.97E-05    |
| Tubb4b         | 431.880092  | -0.660474956 | 0.211438909 | -3.123715301 | 0.001785832 | 0.046616028 |
| Rrm1           | 689.9074291 | -0.657971383 | 0.207593069 | -3.169524812 | 0.001526884 | 0.042726229 |
| Tyms           | 223.8859353 | -0.647483683 | 0.206215668 | -3.139837484 | 0.001690416 | 0.045177507 |
| Macf1          | 4370.86376  | -0.646914353 | 0.126048061 | -5.132283276 | 2.86E-07    | 0.000101841 |
| Plec           | 3494.142119 | -0.639507645 | 0.125023222 | -5.115110885 | 3.14E-07    | 0.000107572 |
| Dhx58          | 141.3524572 | -0.634784896 | 0.148303509 | -4.280309346 | 1.87E-05    | 0.001946559 |
| D830031N03Rik  | 88.25949045 | -0.633572822 | 0.172816023 | -3.666169451 | 0.000246211 | 0.012128723 |
| Arhgap21       | 108.02649   | -0.628901155 | 0.155110423 | -4.054538327 | 5.02E-05    | 0.003838054 |
| H2-T24         | 239.1855592 | -0.623860597 | 0.122960038 | -5.073685784 | 3.90E-07    | 0.000120906 |
| Dync2h1        | 70.55340921 | -0.612462029 | 0.195406573 | -3.134295936 | 0.00172267  | 0.045586695 |
| Ubr4           | 2008.275052 | -0.60589682  | 0.097723673 | -6.200102796 | 5.64E-10    | 7.74E-07    |
| Bcl2           | 258.7224148 | -0.597777038 | 0.187180401 | -3.193587767 | 0.001405166 | 0.040269732 |
| Rcn1           | 108.1868401 | -0.594086088 | 0.175399709 | -3.387041475 | 0.000706507 | 0.024859732 |
| Paqr4          | 114.2343343 | -0.59398845  | 0.180705185 | -3.287058154 | 0.001012399 | 0.032219765 |
| Helz2          | 1460.293818 | -0.584968859 | 0.083361701 | -7.017237552 | 2.26E-12    | 5.45E-09    |
| Ncapd2         | 946.5966358 | -0.583752737 | 0.138462056 | -4.215976236 | 2.49E-05    | 0.002297127 |
| Samhd1         | 1642.449369 | -0.579141095 | 0.096367149 | -6.009735718 | 1.86E-09    | 1.98E-06    |

|               |             |              |             |              |             |             |
|---------------|-------------|--------------|-------------|--------------|-------------|-------------|
| Atp10a        | 482.5316049 | -0.578443768 | 0.120422484 | -4.80345322  | 1.56E-06    | 0.000343453 |
| Esyt1         | 2182.65701  | -0.577658221 | 0.163582763 | -3.531290269 | 0.000413538 | 0.017422995 |
| Ahnak         | 4969.024796 | -0.573229299 | 0.14722673  | -3.893513749 | 9.88E-05    | 0.006045209 |
| Cbx5          | 876.4270924 | -0.572683379 | 0.179739833 | -3.186179536 | 0.001441651 | 0.041093471 |
| Flna          | 6846.760879 | -0.570551859 | 0.140051973 | -4.07385805  | 4.62E-05    | 0.003651227 |
| Oas3          | 956.3245428 | -0.568124731 | 0.143686673 | -3.95391387  | 7.69E-05    | 0.005089274 |
| S100a4        | 353.0322446 | -0.558565411 | 0.17177949  | -3.251642029 | 0.001147404 | 0.034990368 |
| Tagln2        | 975.0617381 | -0.550575372 | 0.146446797 | -3.759558997 | 0.000170213 | 0.009343242 |
| Fam111a       | 432.089732  | -0.546893859 | 0.128437544 | -4.258052911 | 2.06E-05    | 0.002021329 |
| Flnb          | 501.5354332 | -0.544107482 | 0.146074993 | -3.724850302 | 0.000195431 | 0.01042951  |
| Trim30a       | 815.470536  | -0.534690215 | 0.146184468 | -3.657640398 | 0.000254548 | 0.012287369 |
| Mdn1          | 1004.913003 | -0.5319375   | 0.117642365 | -4.521649143 | 6.14E-06    | 0.000920971 |
| Ifi2712a      | 1466.182702 | -0.531196002 | 0.1714024   | -3.099116484 | 0.001940987 | 0.048729064 |
| Cpt1a         | 527.2350224 | -0.531143014 | 0.134103759 | -3.960686978 | 7.47E-05    | 0.005020273 |
| Shmt1         | 83.72355469 | -0.531058519 | 0.167628095 | -3.168075855 | 0.001534515 | 0.042726229 |
| Kmt2a         | 2376.402326 | -0.526580729 | 0.076835059 | -6.853391325 | 7.21E-12    | 1.18E-08    |
| Cad           | 429.676928  | -0.524262723 | 0.134400428 | -3.900751894 | 9.59E-05    | 0.005942977 |
| Cdc25b        | 1413.96044  | -0.52250352  | 0.14960174  | -3.49262996  | 0.000478289 | 0.019321029 |
| Igtp          | 593.830952  | -0.521116365 | 0.13620791  | -3.825889143 | 0.000130301 | 0.007495034 |
| Prkd3         | 595.5608644 | -0.515863077 | 0.114737069 | -4.496045431 | 6.92E-06    | 0.001023097 |
| Mov10         | 330.0187461 | -0.511772571 | 0.115014218 | -4.449646126 | 8.60E-06    | 0.001116527 |
| Pfas          | 280.8366278 | -0.502979642 | 0.121264414 | -4.147792641 | 3.36E-05    | 0.002853715 |
| Irf7          | 355.3976671 | -0.501081583 | 0.152159051 | -3.29314346  | 0.000990739 | 0.031829564 |
| Smg1          | 2378.130903 | -0.496535728 | 0.097228537 | -5.106892943 | 3.27E-07    | 0.000108481 |
| Cdt1          | 174.5201447 | -0.496354075 | 0.160341566 | -3.095604506 | 0.001964121 | 0.048879147 |
| Gm4759        | 554.5807067 | -0.493394319 | 0.136430315 | -3.61645664  | 0.000298663 | 0.013469295 |
| Herc1         | 1215.843185 | -0.493216201 | 0.107522693 | -4.587089351 | 4.49E-06    | 0.000731795 |
| Ifi203        | 960.6868626 | -0.488929953 | 0.068142579 | -7.175101981 | 7.23E-13    | 3.47E-09    |
| Capn2         | 768.1612669 | -0.487913086 | 0.131923108 | -3.698465661 | 0.000216907 | 0.011176711 |
| Pml           | 660.5196734 | -0.481579913 | 0.086893571 | -5.542181161 | 2.99E-08    | 1.69E-05    |
| Vps13d        | 878.1432864 | -0.48135324  | 0.132086501 | -3.644227354 | 0.000268196 | 0.012656274 |
| Herc6         | 240.3444327 | -0.481113436 | 0.135408981 | -3.553039342 | 0.000380808 | 0.016193527 |
| Huwe1         | 2701.709865 | -0.475707316 | 0.097118784 | -4.898200899 | 9.67E-07    | 0.000258466 |
| A430078G23Rik | 247.5792641 | -0.474942972 | 0.13690899  | -3.469041541 | 0.000522319 | 0.020479156 |
| Parp14        | 1448.550731 | -0.473983306 | 0.127723451 | -3.711012373 | 0.000206432 | 0.010777097 |
| Dync1h1       | 2008.450056 | -0.473422493 | 0.110973629 | -4.266081017 | 1.99E-05    | 0.001970087 |
| Atad5         | 241.0059794 | -0.472679757 | 0.129305841 | -3.655517432 | 0.000256664 | 0.012327561 |
| Usp31         | 181.460648  | -0.4705887   | 0.133417395 | -3.527191483 | 0.000419993 | 0.017617694 |
| Ddx58         | 487.2811237 | -0.467333507 | 0.083954388 | -5.566516736 | 2.60E-08    | 1.66E-05    |
| Epsti1        | 861.958146  | -0.463163381 | 0.131761831 | -3.515155934 | 0.000439496 | 0.018223586 |
| Anxa2         | 970.1052302 | -0.461832624 | 0.10373858  | -4.451888814 | 8.51E-06    | 0.001116527 |
| Irgm1         | 476.7457498 | -0.454112198 | 0.103534439 | -4.386097999 | 1.15E-05    | 0.001335606 |
| Smchd1        | 1293.25525  | -0.451516313 | 0.123246913 | -3.663510122 | 0.000248782 | 0.012130982 |
| Ago2          | 1228.011464 | -0.450476545 | 0.08469508  | -5.318804194 | 1.04E-07    | 4.78E-05    |
| Cep350        | 1291.432119 | -0.450107111 | 0.101629164 | -4.428916795 | 9.47E-06    | 0.001181507 |
| Trim25        | 609.1347189 | -0.443060319 | 0.092911999 | -4.768601733 | 1.86E-06    | 0.000379149 |

|          |             |              |             |              |             |             |
|----------|-------------|--------------|-------------|--------------|-------------|-------------|
| Hivep3   | 168.7875969 | -0.442653814 | 0.143231282 | -3.090482807 | 0.001998314 | 0.049346534 |
| Birc6    | 3131.787302 | -0.43658279  | 0.101764462 | -4.290130174 | 1.79E-05    | 0.001927335 |
| Epb4.1l2 | 323.7629615 | -0.434919913 | 0.111190491 | -3.911484795 | 9.17E-05    | 0.005759232 |
| Mcm5     | 766.1419465 | -0.425961862 | 0.112354862 | -3.791218769 | 0.00014991  | 0.008470787 |
| Trrap    | 1269.663832 | -0.422432038 | 0.086849205 | -4.863971272 | 1.15E-06    | 0.000283386 |
| Kmt2d    | 3573.020943 | -0.42000903  | 0.097428573 | -4.310943075 | 1.63E-05    | 0.001774487 |
| Arhgef18 | 675.3454425 | -0.419606619 | 0.131245974 | -3.197100872 | 0.001388164 | 0.040126129 |
| Akap11   | 534.0655978 | -0.418234848 | 0.094507724 | -4.425403856 | 9.63E-06    | 0.001185504 |
| Dnmt1    | 1777.937348 | -0.413592812 | 0.107555556 | -3.84538757  | 0.000120362 | 0.007093238 |
| Dnah8    | 809.2317115 | -0.413544004 | 0.128167511 | -3.226589961 | 0.001252748 | 0.037141671 |
| Rangap1  | 805.4082493 | -0.412854078 | 0.12226304  | -3.376769286 | 0.000733425 | 0.025526393 |
| Tmem109  | 207.5338154 | -0.407312412 | 0.122292574 | -3.330638979 | 0.000866469 | 0.028900351 |
| Mycbp2   | 2117.616529 | -0.405664249 | 0.079818381 | -5.082341228 | 3.73E-07    | 0.000119374 |
| Pcnt     | 781.4326935 | -0.404803313 | 0.084302363 | -4.801802706 | 1.57E-06    | 0.000343453 |
| Tmpo     | 1368.796223 | -0.403710658 | 0.125588158 | -3.214559914 | 0.001306446 | 0.038261356 |
| Rexo2    | 318.3435923 | -0.403579327 | 0.117404393 | -3.437514711 | 0.000587079 | 0.021943499 |
| Fryl     | 1380.793522 | -0.402037451 | 0.083900807 | -4.791818615 | 1.65E-06    | 0.000348945 |
| Gm15800  | 761.9662756 | -0.401783249 | 0.101270956 | -3.967408473 | 7.27E-05    | 0.004915187 |
| Ccdc88c  | 1381.636559 | -0.398751319 | 0.087944948 | -4.53410147  | 5.78E-06    | 0.00089629  |
| Sptbn1   | 3227.706016 | -0.395314481 | 0.072471171 | -5.454782566 | 4.90E-08    | 2.48E-05    |
| Pag1     | 1335.07452  | -0.394326107 | 0.106576392 | -3.699938609 | 0.000215652 | 0.011176711 |
| Kmt2c    | 1286.408984 | -0.392321822 | 0.083382092 | -4.705108865 | 2.54E-06    | 0.000483058 |
| Anxa6    | 3235.081078 | -0.390122821 | 0.109484107 | -3.563282674 | 0.000366246 | 0.015776495 |
| Herc2    | 1074.058682 | -0.390026786 | 0.088632806 | -4.400478836 | 1.08E-05    | 0.001280945 |
| Sptan1   | 2007.677142 | -0.388148402 | 0.084435229 | -4.596995921 | 4.29E-06    | 0.000709893 |
| Ankrd52  | 735.2404787 | -0.384272615 | 0.098174637 | -3.914174019 | 9.07E-05    | 0.005732899 |
| Trem12   | 350.6804377 | -0.38188742  | 0.117671891 | -3.245358048 | 0.00117303  | 0.035434369 |
| Morc3    | 539.5283492 | -0.376792694 | 0.083167353 | -4.530536071 | 5.88E-06    | 0.000897082 |
| Mcm4     | 806.2522875 | -0.376598058 | 0.103961793 | -3.622465975 | 0.000291808 | 0.013222199 |
| Gm1966   | 1374.870975 | -0.370337444 | 0.089888337 | -4.11997214  | 3.79E-05    | 0.003137835 |
| Odf2     | 497.3352065 | -0.364232393 | 0.107297393 | -3.394606191 | 0.000687274 | 0.024386632 |
| Gart     | 406.6003629 | -0.363578273 | 0.111466891 | -3.261760248 | 0.001107227 | 0.034309764 |
| Hsph1    | 526.8634481 | -0.362288176 | 0.099688885 | -3.634188273 | 0.000278857 | 0.012816756 |
| Htt      | 723.0386358 | -0.362257515 | 0.089707043 | -4.038228272 | 5.39E-05    | 0.003906384 |
| Ttll12   | 276.5960923 | -0.359287928 | 0.114212605 | -3.145781741 | 0.001656436 | 0.044695846 |
| Usp24    | 773.908626  | -0.354469562 | 0.087839268 | -4.035433933 | 5.45E-05    | 0.003907024 |
| Ddx39    | 447.0403176 | -0.353488449 | 0.114156628 | -3.096521459 | 0.001958057 | 0.048879147 |
| Efr3a    | 821.5172961 | -0.353226502 | 0.080414879 | -4.392551562 | 1.12E-05    | 0.001312368 |
| Heatr1   | 602.831822  | -0.348326997 | 0.074740535 | -4.660483076 | 3.15E-06    | 0.00057999  |
| Hcfc1    | 2169.057124 | -0.344449998 | 0.08066756  | -4.269993997 | 1.95E-05    | 0.001956004 |
| Ranbp2   | 1853.781798 | -0.343460036 | 0.108397495 | -3.168523749 | 0.001532152 | 0.042726229 |
| Ascc3    | 583.0925179 | -0.338523213 | 0.08950653  | -3.782106305 | 0.000155507 | 0.008735669 |
| Ep400    | 1584.046933 | -0.337814866 | 0.10185402  | -3.316657171 | 0.000911013 | 0.0299312   |
| Snx27    | 319.8234855 | -0.335443528 | 0.101413603 | -3.307677837 | 0.00094073  | 0.030632707 |
| Prrc2b   | 2636.556024 | -0.334157266 | 0.06458309  | -5.174067455 | 2.29E-07    | 9.17E-05    |
| Rictor   | 536.8880918 | -0.333600819 | 0.102487559 | -3.25503721  | 0.001133775 | 0.034795667 |

|          |             |              |             |              |             |             |
|----------|-------------|--------------|-------------|--------------|-------------|-------------|
| Stat1    | 2629.035965 | -0.332004316 | 0.078554349 | -4.226428232 | 2.37E-05    | 0.002214322 |
| Zbp1     | 694.6297274 | -0.328031504 | 0.104102102 | -3.151055527 | 0.001626816 | 0.044201022 |
| Ankrd17  | 1519.188666 | -0.327857126 | 0.066574922 | -4.924634005 | 8.45E-07    | 0.000238789 |
| Prrc2c   | 5116.249371 | -0.326461958 | 0.099187209 | -3.291371553 | 0.000997001 | 0.031923983 |
| Cnot1    | 2324.337953 | -0.325490138 | 0.06007781  | -5.417809619 | 6.03E-08    | 2.90E-05    |
| Kpnb1    | 2078.351583 | -0.321289043 | 0.077012775 | -4.171892799 | 3.02E-05    | 0.002686832 |
| Setx     | 1995.585581 | -0.321273985 | 0.08115428  | -3.958805167 | 7.53E-05    | 0.005024849 |
| Ep300    | 1556.218138 | -0.32112232  | 0.05498908  | -5.839747107 | 5.23E-09    | 4.57E-06    |
| Setd8    | 447.5056699 | -0.320957717 | 0.083774093 | -3.831228806 | 0.000127505 | 0.007378384 |
| Kcnab2   | 1158.280434 | -0.320922128 | 0.092140722 | -3.48295651  | 0.000495909 | 0.019848754 |
| Nup214   | 651.7263646 | -0.320073078 | 0.080379961 | -3.982000929 | 6.83E-05    | 0.004655675 |
| Pds5b    | 603.1446491 | -0.315567554 | 0.077833954 | -4.054368772 | 5.03E-05    | 0.003838054 |
| Atp2b1   | 545.416454  | -0.313616524 | 0.081188544 | -3.862817453 | 0.000112087 | 0.006687612 |
| Prkdc    | 486.4476767 | -0.311060659 | 0.090561072 | -3.434816436 | 0.000592955 | 0.022054451 |
| Tpm4     | 1450.970941 | -0.310687623 | 0.082633778 | -3.759813862 | 0.00017004  | 0.009343242 |
| Nup210   | 3337.954537 | -0.306583898 | 0.098876081 | -3.100688208 | 0.001930715 | 0.048729064 |
| Nfya     | 433.4844389 | -0.303982011 | 0.082208798 | -3.697682224 | 0.000217577 | 0.011176711 |
| Vps13c   | 461.6179454 | -0.301371296 | 0.085901095 | -3.508352201 | 0.000450892 | 0.018509682 |
| Hspa8    | 7012.286074 | -0.298970151 | 0.094053839 | -3.178712883 | 0.001479305 | 0.041918018 |
| Akap13   | 4056.607759 | -0.297961104 | 0.081948639 | -3.6359494   | 0.000276959 | 0.012790698 |
| Znfx1    | 631.0576582 | -0.297537492 | 0.090777277 | -3.277664875 | 0.001046696 | 0.03275101  |
| Lnpep    | 1499.78724  | -0.292349814 | 0.092146084 | -3.172677574 | 0.001510402 | 0.042548146 |
| Vprbp    | 495.1923739 | -0.292203336 | 0.090844962 | -3.216505686 | 0.00129762  | 0.038119065 |
| Acsl5    | 854.7161593 | -0.290950505 | 0.084500312 | -3.443188519 | 0.000574898 | 0.021695597 |
| Dock10   | 2134.05704  | -0.290629176 | 0.077473646 | -3.751329542 | 0.000175899 | 0.009527309 |
| Pprc1    | 377.7787545 | -0.286868968 | 0.091592474 | -3.132014615 | 0.001736112 | 0.045690671 |
| Zzef1    | 868.3251748 | -0.285585887 | 0.077665493 | -3.677127053 | 0.000235876 | 0.011679488 |
| Tnrc6b   | 1253.744502 | -0.285006307 | 0.091399055 | -3.118263185 | 0.001819203 | 0.046725298 |
| Arid2    | 635.5464217 | -0.28475913  | 0.080793498 | -3.524530271 | 0.000424234 | 0.017718239 |
| Ahctf1   | 771.9268365 | -0.284609471 | 0.070981271 | -4.009641765 | 6.08E-05    | 0.00423297  |
| Setd1b   | 859.261766  | -0.275038557 | 0.074611554 | -3.686273007 | 0.000227562 | 0.011505067 |
| Jmjd1c   | 1063.029609 | -0.272836759 | 0.080882627 | -3.373243049 | 0.000742883 | 0.025669563 |
| Ankrd44  | 2062.061146 | -0.271603942 | 0.056276492 | -4.826241476 | 1.39E-06    | 0.00032598  |
| Trap1    | 504.3135199 | -0.27138302  | 0.080577591 | -3.367971369 | 0.000757235 | 0.026071668 |
| Usp34    | 1727.091186 | -0.264701358 | 0.061324327 | -4.31641687  | 1.59E-05    | 0.001750968 |
| Elf4     | 1790.227324 | -0.259254484 | 0.061897059 | -4.188478214 | 2.81E-05    | 0.002521182 |
| Adar     | 1105.565043 | -0.258940857 | 0.083776295 | -3.090860672 | 0.001995773 | 0.049346534 |
| Snrnp200 | 1870.041492 | -0.258814101 | 0.072834662 | -3.553446877 | 0.000380218 | 0.016193527 |
| Prpf8    | 3233.217127 | -0.257273319 | 0.082046894 | -3.135686271 | 0.001714525 | 0.045543159 |
| Chd8     | 1298.236674 | -0.248653095 | 0.07456497  | -3.334717321 | 0.000853862 | 0.028587352 |
| Dnajc13  | 766.0620372 | -0.245927335 | 0.078838279 | -3.119389935 | 0.00181226  | 0.046725298 |
| Iqgap1   | 3263.356929 | -0.242457772 | 0.064375447 | -3.766308165 | 0.000165679 | 0.009252995 |
| Ppp1r12a | 1158.440449 | -0.241918124 | 0.070905258 | -3.411850295 | 0.000645235 | 0.023388629 |
| Aqr      | 764.4595697 | -0.234368056 | 0.06672316  | -3.512544342 | 0.000443838 | 0.018298314 |
| Dock2    | 4061.889843 | -0.227192629 | 0.053692537 | -4.231363287 | 2.32E-05    | 0.002187523 |
| Mtpn     | 1103.989836 | -0.214141307 | 0.06531199  | -3.278744194 | 0.001042701 | 0.03275101  |

|           |             |              |             |              |             |             |
|-----------|-------------|--------------|-------------|--------------|-------------|-------------|
| Son       | 4300.029269 | -0.16884679  | 0.050634238 | -3.334636759 | 0.000854109 | 0.028587352 |
| Pcd6ip    | 1415.996865 | -0.168050876 | 0.05384208  | -3.121180999 | 0.001801273 | 0.046725298 |
| Sf3b1     | 3698.697944 | -0.166412601 | 0.052394953 | -3.176118897 | 0.001492598 | 0.042170273 |
| Msn       | 7711.093963 | -0.161280827 | 0.051711461 | -3.118860406 | 0.00181552  | 0.046725298 |
| Mlec      | 2535.467551 | -0.160208482 | 0.050121602 | -3.196395872 | 0.00139156  | 0.040126129 |
| Ndfip1    | 991.4501823 | 0.215379503  | 0.066691305 | 3.229498993  | 0.001240073 | 0.0368797   |
| Tmem173   | 997.217391  | 0.217057739  | 0.070045088 | 3.098828831  | 0.001942872 | 0.048729064 |
| Ppp2r1a   | 1017.179855 | 0.225590965  | 0.071147174 | 3.170764954  | 0.001520381 | 0.042704037 |
| Galnt2    | 641.0609947 | 0.233887029  | 0.075363206 | 3.103464438  | 0.001912692 | 0.048526845 |
| R3hdm4    | 638.0534398 | 0.249161321  | 0.071635084 | 3.478202417  | 0.000504789 | 0.019954729 |
| Rpl18     | 1844.763737 | 0.257316497  | 0.065546192 | 3.925727612  | 8.65E-05    | 0.005537408 |
| Laptm5    | 10698.18228 | 0.260470351  | 0.07853476  | 3.316625046  | 0.000911118 | 0.0299312   |
| Shisa5    | 7097.683421 | 0.270495315  | 0.057516437 | 4.702921982  | 2.56E-06    | 0.000483058 |
| Tpt1      | 10024.54051 | 0.271134513  | 0.068598882 | 3.952462581  | 7.74E-05    | 0.005089274 |
| Prr13     | 900.3647018 | 0.271160277  | 0.079192665 | 3.42405797   | 0.000616935 | 0.022619365 |
| Sla       | 1461.033537 | 0.273708932  | 0.079906242 | 3.425376109  | 0.000613949 | 0.022596141 |
| Cd82      | 2780.402501 | 0.27522106   | 0.059652835 | 4.613712962  | 3.96E-06    | 0.000690826 |
| Trp53inp1 | 1639.195118 | 0.286756807  | 0.071028097 | 4.037230608  | 5.41E-05    | 0.003906384 |
| Cdk2ap2   | 464.2587525 | 0.288451333  | 0.084980513 | 3.394323258  | 0.000687984 | 0.024386632 |
| Lime1     | 849.5616635 | 0.290928347  | 0.068123706 | 4.270588969  | 1.95E-05    | 0.001956004 |
| Pnrc2     | 554.3682775 | 0.292500762  | 0.080248987 | 3.644915317  | 0.00026748  | 0.012656274 |
| Mob3a     | 850.0641912 | 0.30824423   | 0.097554598 | 3.1597099    | 0.001579263 | 0.043344001 |
| Bsc12     | 375.2325606 | 0.312622037  | 0.098915871 | 3.160484106  | 0.001575072 | 0.043344001 |
| Pigs      | 371.2314194 | 0.327547767  | 0.094675707 | 3.459681221  | 0.000540815 | 0.020863739 |
| Pld3      | 381.9073173 | 0.332464243  | 0.092931558 | 3.57751717   | 0.000346873 | 0.015214914 |
| Rps3      | 4294.898474 | 0.337044324  | 0.076093409 | 4.429349787  | 9.45E-06    | 0.001181507 |
| Use1      | 366.4268839 | 0.337544533  | 0.104783821 | 3.221342092  | 0.001275918 | 0.037596514 |
| Anxa11    | 676.7524598 | 0.341666504  | 0.102858042 | 3.321728639  | 0.000894617 | 0.029735939 |
| Itm2c     | 686.3591858 | 0.342258387  | 0.104127835 | 3.286905827  | 0.001012947 | 0.032219765 |
| Gpr146    | 290.2361366 | 0.345606883  | 0.111371676 | 3.103184707  | 0.001914501 | 0.048526845 |
| Gcnt1     | 517.0424375 | 0.350055948  | 0.084088586 | 4.162942478  | 3.14E-05    | 0.002718866 |
| Ctsb      | 1258.945127 | 0.352416217  | 0.087105956 | 4.045833754  | 5.21E-05    | 0.003858441 |
| Gpr174    | 465.9868351 | 0.358050785  | 0.086106964 | 4.1582094    | 3.21E-05    | 0.002751021 |
| Rps8      | 2515.38353  | 0.360467985  | 0.087052738 | 4.140800104  | 3.46E-05    | 0.002890959 |
| Rpl12     | 3506.954656 | 0.361305247  | 0.113159274 | 3.192891163  | 0.00140856  | 0.040269732 |
| Adk       | 418.2950621 | 0.369730487  | 0.11927875  | 3.099717985  | 0.00193705  | 0.048729064 |
| Rnf19a    | 1303.711898 | 0.378441402  | 0.109925629 | 3.442703988  | 0.000575929 | 0.021695597 |
| Ankrd46   | 265.1831228 | 0.39090953   | 0.113440863 | 3.445932261  | 0.000569093 | 0.021607539 |
| Lbh       | 1853.464507 | 0.402719937  | 0.100021166 | 4.026347163  | 5.67E-05    | 0.004001325 |
| Rps19     | 1864.714846 | 0.409238454  | 0.114189895 | 3.583841221  | 0.000338578 | 0.014987925 |
| Rfxank    | 164.2331777 | 0.41403429   | 0.121695847 | 3.402205573  | 0.000668443 | 0.023959205 |
| Sdf4      | 1278.157283 | 0.41976152   | 0.114079393 | 3.67955605   | 0.00023364  | 0.011641708 |
| Gpr171    | 481.1049206 | 0.421349428  | 0.115718476 | 3.641159499  | 0.000271413 | 0.012656274 |
| Sgsh      | 489.1996438 | 0.424316901  | 0.125368936 | 3.384545756  | 0.000712961 | 0.024904388 |
| Tnfaip8   | 549.1759306 | 0.427724142  | 0.109956339 | 3.889945289  | 0.000100267 | 0.006095969 |
| Lpxn      | 410.241393  | 0.431734262  | 0.122834143 | 3.514774071  | 0.000440128 | 0.018223586 |



|               |             |             |             |             |             |             |
|---------------|-------------|-------------|-------------|-------------|-------------|-------------|
| Cd53          | 4879.500817 | 0.434429802 | 0.101437151 | 4.282748479 | 1.85E-05    | 0.001946559 |
| Tnfrsf18      | 458.9737049 | 0.437025912 | 0.132237685 | 3.304851496 | 0.000950267 | 0.030838744 |
| Rps18         | 2699.240805 | 0.438749431 | 0.09834941  | 4.461129241 | 8.15E-06    | 0.001094589 |
| Ndufa7        | 186.1956841 | 0.456487951 | 0.128482579 | 3.552917103 | 0.000380985 | 0.016193527 |
| Ugcg          | 1973.812309 | 0.460434758 | 0.129040456 | 3.568142676 | 0.000359521 | 0.015556559 |
| Cd8b1         | 150.08476   | 0.460533432 | 0.128196094 | 3.592413905 | 0.000327629 | 0.014638155 |
| Cyb5          | 377.6390049 | 0.465331227 | 0.138284669 | 3.365023987 | 0.00076537  | 0.026171901 |
| Spint2        | 278.8725534 | 0.478517591 | 0.139345054 | 3.434047921 | 0.000594639 | 0.022054451 |
| Podnl1        | 432.5419767 | 0.494762104 | 0.136255736 | 3.631128624 | 0.000282184 | 0.012907925 |
| Slc11a2       | 380.1361812 | 0.495058301 | 0.134026016 | 3.693747782 | 0.000220973 | 0.011282586 |
| Rab19         | 220.799365  | 0.500913583 | 0.12945242  | 3.869480245 | 0.000109068 | 0.006548147 |
| Rps15a        | 2368.65758  | 0.506702972 | 0.149676408 | 3.385322914 | 0.000710946 | 0.024904388 |
| Fam117b       | 953.4216162 | 0.509366937 | 0.110709852 | 4.600917889 | 4.21E-06    | 0.000708878 |
| Ubash3b       | 208.0066112 | 0.509649851 | 0.130714712 | 3.898947909 | 9.66E-05    | 0.005949042 |
| Ypel3         | 377.697223  | 0.513715374 | 0.151443085 | 3.392134898 | 0.000693503 | 0.02449187  |
| Ndufa6        | 357.623744  | 0.513873751 | 0.14981965  | 3.429948947 | 0.000603695 | 0.022304202 |
| Cox14         | 132.6427645 | 0.517145954 | 0.14977059  | 3.452920599 | 0.000554552 | 0.021146668 |
| Naga          | 211.0069886 | 0.517547402 | 0.163590233 | 3.163681541 | 0.001557872 | 0.043251198 |
| Hcst          | 249.7999359 | 0.524304664 | 0.125879557 | 4.165129563 | 3.11E-05    | 0.002718866 |
| Rpl27         | 1110.090092 | 0.526315162 | 0.131425095 | 4.004677823 | 6.21E-05    | 0.004261089 |
| Adcy6         | 196.2566613 | 0.530725583 | 0.138506857 | 3.831763968 | 0.000127228 | 0.007378384 |
| Ptms          | 285.2742959 | 0.549440176 | 0.114714798 | 4.789619007 | 1.67E-06    | 0.000348945 |
| Mturn         | 100.8242172 | 0.549521861 | 0.176189742 | 3.118920854 | 0.001815147 | 0.046725298 |
| Pdcd1lg2      | 166.8380345 | 0.550746997 | 0.172342944 | 3.195645759 | 0.001395183 | 0.040126129 |
| Rps29         | 2746.811572 | 0.559007404 | 0.178740198 | 3.127485647 | 0.001763084 | 0.046273737 |
| Eya2          | 127.5889591 | 0.567474222 | 0.180760374 | 3.139372921 | 0.001693098 | 0.045177507 |
| Rpl14-ps1     | 115.3790254 | 0.581079974 | 0.167942156 | 3.460000676 | 0.000540174 | 0.020863739 |
| H1f0          | 458.1859034 | 0.589092183 | 0.134856358 | 4.368293728 | 1.25E-05    | 0.001431992 |
| Ncoa7         | 2186.269476 | 0.595221244 | 0.150891892 | 3.944686739 | 7.99E-05    | 0.005221506 |
| Rps14         | 2326.075389 | 0.60334418  | 0.131006924 | 4.605437347 | 4.12E-06    | 0.000706041 |
| Igsf23        | 103.2711724 | 0.603926493 | 0.183326391 | 3.294269243 | 0.000986779 | 0.031808731 |
| Abcb9         | 469.8688151 | 0.605756827 | 0.177299407 | 3.416575595 | 0.000634141 | 0.023161803 |
| Ebi3          | 219.4232203 | 0.60867722  | 0.194758141 | 3.12529796  | 0.00177625  | 0.046492266 |
| Casp6         | 89.85168351 | 0.612955244 | 0.164974617 | 3.715451839 | 0.000202841 | 0.010705987 |
| 9030617O03Rik | 108.9174216 | 0.613089443 | 0.183283928 | 3.345025661 | 0.00082275  | 0.027911798 |
| Rgs10         | 776.6711684 | 0.615308973 | 0.161610705 | 3.807352817 | 0.000140462 | 0.008031433 |
| I730030J21Rik | 153.904721  | 0.618491073 | 0.18517072  | 3.340112701 | 0.000837444 | 0.02822627  |
| Cd83          | 531.6699298 | 0.622550977 | 0.167537934 | 3.715880714 | 0.000202497 | 0.010705987 |
| Slc41a3       | 92.68148549 | 0.651076243 | 0.165608661 | 3.93141421  | 8.44E-05    | 0.005444322 |
| Nudt22        | 48.10408055 | 0.671409923 | 0.209890459 | 3.198858713 | 0.001379728 | 0.040041281 |
| Smco4         | 360.1767086 | 0.679129382 | 0.199109726 | 3.410829766 | 0.000647655 | 0.023388629 |
| Ikzf3         | 523.9650573 | 0.683360772 | 0.115007196 | 5.94189579  | 2.82E-09    | 2.71E-06    |
| H2-DMa        | 193.4946995 | 0.686253947 | 0.218515126 | 3.14053292  | 0.001686408 | 0.045177507 |
| Oaz2          | 53.2502492  | 0.69681406  | 0.207219289 | 3.362689176 | 0.000771872 | 0.026292923 |
| Tmem9         | 48.2637663  | 0.703503924 | 0.212150391 | 3.316062351 | 0.000912955 | 0.0299312   |
| Gsn           | 454.9558265 | 0.711480975 | 0.16975443  | 4.191236571 | 2.77E-05    | 0.002521182 |

|               |             |             |             |             |             |             |
|---------------|-------------|-------------|-------------|-------------|-------------|-------------|
| A630023P12Rik | 66.54331962 | 0.74407996  | 0.224455078 | 3.315050692 | 0.000916265 | 0.029937559 |
| Tnfrsf9       | 176.5329502 | 0.745555797 | 0.158153472 | 4.714128539 | 2.43E-06    | 0.000475884 |
| Il1r1         | 252.9412693 | 0.802926228 | 0.216348681 | 3.711260111 | 0.00020623  | 0.010777097 |
| Meis3         | 72.65282241 | 0.828103376 | 0.182174158 | 4.545668734 | 5.48E-06    | 0.000862353 |
| Ramp3         | 66.85434079 | 0.846725084 | 0.204471707 | 4.141037889 | 3.46E-05    | 0.002890959 |
| Dnase2a       | 45.12719234 | 0.847482901 | 0.259940136 | 3.260300297 | 0.001112943 | 0.034375986 |
| Marcks        | 192.011118  | 0.849895598 | 0.185834489 | 4.573400793 | 4.80E-06    | 0.000768273 |
| Tmie          | 92.46586154 | 0.85581429  | 0.192646299 | 4.442412312 | 8.90E-06    | 0.001139347 |
| Epas1         | 2265.90211  | 0.89435214  | 0.27239945  | 3.283237689 | 0.001026221 | 0.032534254 |
| Il4           | 340.6820129 | 0.898276573 | 0.251548023 | 3.57099437  | 0.000355629 | 0.015528035 |
| Wls           | 60.90907158 | 0.898524501 | 0.212202011 | 4.23428834  | 2.29E-05    | 0.002186009 |
| 1700056E22Rik | 22.30473731 | 0.907105129 | 0.287561956 | 3.15446849  | 0.001607907 | 0.043879428 |
| Tha1          | 47.59319394 | 0.952512195 | 0.220299902 | 4.323706855 | 1.53E-05    | 0.001713768 |
| 6430562O15Rik | 78.07659996 | 0.964543046 | 0.261210876 | 3.692583792 | 0.000221987 | 0.011282586 |
| 9330020H09Rik | 26.71058128 | 0.971917154 | 0.284585473 | 3.415202973 | 0.000637345 | 0.023190667 |
| D630039A03Rik | 54.47344548 | 0.991864538 | 0.222147107 | 4.464899634 | 8.01E-06    | 0.001094589 |
| Socs3         | 176.1911475 | 1.026626861 | 0.213804508 | 4.801708214 | 1.57E-06    | 0.000343453 |
| Abat          | 21.32064566 | 1.059416302 | 0.337890282 | 3.135385532 | 0.001716284 | 0.045543159 |
| Egln3         | 200.9130934 | 1.063044055 | 0.155178556 | 6.850457181 | 7.36E-12    | 1.18E-08    |
| Nipal1        | 106.9426594 | 1.116450403 | 0.239906286 | 4.653693827 | 3.26E-06    | 0.00057999  |
| Mapk13        | 30.3638121  | 1.122267099 | 0.280014035 | 4.007895892 | 6.13E-05    | 0.004233697 |
| Adora3        | 30.15522114 | 1.220000334 | 0.324267746 | 3.762324032 | 0.000168342 | 0.009343242 |
| Asb2          | 184.393992  | 1.361784663 | 0.240171002 | 5.67006279  | 1.43E-08    | 9.79E-06    |
| Lag3          | 82.14168911 | 1.578222395 | 0.27659013  | 5.705996801 | 1.16E-08    | 8.55E-06    |

**Supplementary Table 2****Gene set enrichment analysis. Core enriched genes in *Il6*<sup>ΔDC</sup> primed 2D2 effector T cells.**

The expression profiles (RNA Seq) of antigen specific effector T cells (2D2) primed in an *Il6*<sup>flax/flax</sup> control environment vs an *Il6*<sup>ΔDC</sup> environment were assessed for the enrichment of genes differentially up-regulated in a global *Il6*<sup>-/-</sup> environment. Core enriched genes of that gene set in *Il6*<sup>ΔDC</sup> primed T cells. Analysis was performed with GSEA software v2.2.1 provided by the Broad Institute, Cambridge, USA.

**Supplementary Table 2**

| NAME   | PROBE         | GENE SYMBOL   | RANK IN GENE LIST | RANK METRIC SCORE | RUNNING ES | CORE ENRICHMENT |
|--------|---------------|---------------|-------------------|-------------------|------------|-----------------|
| row_0  | Ceacam1       | CEACAM1       | 640               | 0.429431          | -0.007172  | Yes             |
| row_1  | Mtus1         | MTUS1         | 733               | 0.402096          | 0.007549   | Yes             |
| row_2  | Cxcr2         | CXCR2         | 1016              | 0.329007          | 0.010859   | Yes             |
| row_3  | Cfb           | CFB           | 1062              | 0.320306          | 0.023781   | Yes             |
| row_4  | Il13ra1       | IL13RA1       | 1345              | 0.272946          | 0.024496   | Yes             |
| row_5  | Ccnd1         | CCND1         | 1403              | 0.266827          | 0.034436   | Yes             |
| row_6  | Csf2rb        | CSF2RB        | 1452              | 0.259797          | 0.044431   | Yes             |
| row_7  | I830012O16Rik | I830012O16RIK | 1466              | 0.257489          | 0.055799   | Yes             |
| row_8  | Mx2           | MX2           | 1496              | 0.254231          | 0.066339   | Yes             |
| row_9  | Rsad2         | RSAD2         | 1656              | 0.233189          | 0.070412   | Yes             |
| row_10 | Sapcd2        | SAPCD2        | 1708              | 0.227618          | 0.078791   | Yes             |
| row_11 | Ccdc18        | CCDC18        | 1741              | 0.223338          | 0.087775   | Yes             |
| row_12 | Cacna1e       | CACNA1E       | 1854              | 0.209995          | 0.092760   | Yes             |
| row_13 | Arhgap33      | ARHGAP33      | 1985              | 0.197580          | 0.096411   | Yes             |
| row_14 | Il1b          | IL1B          | 2004              | 0.194920          | 0.104671   | Yes             |
| row_15 | Ifit3         | IFIT3         | 2145              | 0.182009          | 0.107178   | Yes             |
| row_16 | Wnt10a        | WNT10A        | 2181              | 0.179277          | 0.113996   | Yes             |
| row_17 | Coro2a        | CORO2A        | 2227              | 0.175869          | 0.120234   | Yes             |
| row_18 | Slnf4         | SLFN4         | 2335              | 0.168600          | 0.123515   | Yes             |
| row_19 | Ifng          | IFNG          | 2395              | 0.163738          | 0.128600   | Yes             |
| row_20 | Cd86          | CD86          | 2406              | 0.162796          | 0.135711   | Yes             |
| row_21 | Oas2          | OAS2          | 2495              | 0.157384          | 0.139276   | Yes             |
| row_22 | Alcam         | ALCAM         | 2542              | 0.153688          | 0.144445   | Yes             |
| row_23 | Espl1         | ESPL1         | 2597              | 0.149471          | 0.149081   | Yes             |
| row_24 | C1qa          | C1QA          | 2600              | 0.149135          | 0.155898   | Yes             |
| row_25 | Dgkh          | DGKH          | 2604              | 0.148759          | 0.162656   | Yes             |
| row_26 | Ska3          | SKA3          | 2614              | 0.148361          | 0.169142   | Yes             |
| row_27 | Iqgap3        | IQGAP3        | 2785              | 0.138480          | 0.168367   | Yes             |
| row_28 | Gpsm2         | GPSM2         | 2831              | 0.136783          | 0.172796   | Yes             |
| row_29 | Asap2         | ASAP2         | 2930              | 0.131200          | 0.174726   | Yes             |
| row_30 | Tjp2          | TJP2          | 2989              | 0.127042          | 0.178155   | Yes             |
| row_31 | Mx1           | MX1           | 3001              | 0.126223          | 0.183532   | Yes             |
| row_32 | Mmp8          | MMP8          | 3002              | 0.126164          | 0.189371   | Yes             |
| row_33 | B3gnt5        | B3GNT5        | 3011              | 0.125823          | 0.194856   | Yes             |
| row_34 | Gas2l3        | GAS2L3        | 3102              | 0.121595          | 0.196680   | Yes             |
| row_35 | 2610318N02Rik | 2610318N02RIK | 3119              | 0.120252          | 0.201569   | Yes             |
| row_36 | Oasl2         | OASL2         | 3136              | 0.119152          | 0.206407   | Yes             |
| row_37 | Dync2h1       | DYNC2H1       | 3160              | 0.117641          | 0.210880   | Yes             |
| row_38 | Kif2c         | KIF2C         | 3168              | 0.116815          | 0.215990   | Yes             |
| row_39 | Hip1          | HIP1          | 3170              | 0.116576          | 0.221343   | Yes             |
| row_40 | Depdc1a       | DEPDC1A       | 3284              | 0.111141          | 0.221712   | Yes             |
| row_41 | Hist1h2an     | HIST1H2AN     | 3435              | 0.105267          | 0.220244   | Yes             |
| row_42 | Anln          | ANLN          | 3455              | 0.104373          | 0.224272   | Yes             |
| row_43 | Myof          | MYOF          | 3468              | 0.103502          | 0.228555   | Yes             |
| row_44 | 2410089E03Rik | 2410089E03RIK | 3489              | 0.102098          | 0.232435   | Yes             |
| row_45 | Stil          | STIL          | 3516              | 0.100612          | 0.235993   | Yes             |
| row_46 | Amica1        | AMICA1        | 3520              | 0.100296          | 0.240508   | Yes             |
| row_47 | Qpct          | QPCT          | 3531              | 0.099905          | 0.244709   | Yes             |
| row_48 | Osbpl3        | OSBPL3        | 3549              | 0.098859          | 0.248565   | Yes             |

|         |                |                |      |          |          |     |
|---------|----------------|----------------|------|----------|----------|-----|
| row_49  | Hist1h3a       | HIST1H3A       | 3557 | 0.098414 | 0.252824 | Yes |
| row_50  | Usp18          | USP18          | 3575 | 0.097315 | 0.256610 | Yes |
| row_51  | Pik3ap1        | PIK3AP1        | 3581 | 0.096943 | 0.260885 | Yes |
| row_52  | Prr11          | PRR11          | 3671 | 0.093014 | 0.261429 | Yes |
| row_53  | Gpr65          | GPR65          | 3680 | 0.092433 | 0.265368 | Yes |
| row_54  | Slnf3          | SLFN3          | 3681 | 0.092425 | 0.269646 | Yes |
| row_55  | Eri2           | ERI2           | 3724 | 0.090648 | 0.272066 | Yes |
| row_56  | Ifit1          | IFIT1          | 3786 | 0.089588 | 0.273635 | Yes |
| row_57  | Ccnb1          | CCNB1          | 3905 | 0.084680 | 0.272567 | Yes |
| row_58  | Nhsl2          | NHSL2          | 3955 | 0.083478 | 0.274360 | Yes |
| row_59  | Ddx60          | DDX60          | 3990 | 0.082263 | 0.276730 | Yes |
| row_60  | D830031N03Rik  | D830031N03RIK  | 4015 | 0.081437 | 0.279485 | Yes |
| row_61  | Plk1           | PLK1           | 4044 | 0.080950 | 0.282048 | Yes |
| row_62  | Rad54l         | RAD54L         | 4061 | 0.079976 | 0.285073 | Yes |
| row_63  | Aurka          | AURKA          | 4125 | 0.077670 | 0.286005 | Yes |
| row_64  | 2610020H08Rik  | 2610020H08RIK  | 4148 | 0.076792 | 0.288630 | Yes |
| row_65  | Ticrr          | TICRR          | 4151 | 0.076687 | 0.292094 | Yes |
| row_66  | Rad51ap1       | RAD51AP1       | 4195 | 0.075453 | 0.293769 | Yes |
| row_67  | Hmmr           | HMMR           | 4212 | 0.074884 | 0.296559 | Yes |
| row_68  | Pfas           | PFAS           | 4224 | 0.074515 | 0.299542 | Yes |
| row_69  | Ttn            | TTN            | 4235 | 0.074209 | 0.302554 | Yes |
| row_70  | Aurkb          | AURKB          | 4248 | 0.073675 | 0.305457 | Yes |
| row_71  | Rassf4         | RASSF4         | 4250 | 0.073437 | 0.308813 | Yes |
| row_72  | Foxm1          | FOXM1          | 4251 | 0.073436 | 0.312212 | Yes |
| row_73  | Kifc5b         | KIFC5B         | 4256 | 0.073252 | 0.315433 | Yes |
| row_74  | Cdca8          | CDCA8          | 4271 | 0.072701 | 0.318206 | Yes |
| row_75  | Oas1a          | OAS1A          | 4294 | 0.072330 | 0.320624 | Yes |
| row_76  | Ncapg          | NCAPG          | 4315 | 0.071305 | 0.323079 | Yes |
| row_77  | Cenpf          | CENPF          | 4317 | 0.071285 | 0.326336 | Yes |
| row_78  | Melk           | MELK           | 4325 | 0.071182 | 0.329334 | Yes |
| row_79  | Hsh2d          | HSH2D          | 4361 | 0.070015 | 0.331095 | Yes |
| row_80  | Kif4           | KIF4           | 4366 | 0.069816 | 0.334157 | Yes |
| row_81  | Ect2           | ECT2           | 4518 | 0.068318 | 0.330938 | Yes |
| row_82  | Depdc1b        | DEPDC1B        | 4616 | 0.065670 | 0.329878 | Yes |
| row_83  | Usp31          | USP31          | 4623 | 0.065400 | 0.332651 | Yes |
| row_84  | Cpd            | CPD            | 4625 | 0.065372 | 0.335634 | Yes |
| row_85  | Mdn1           | MDN1           | 4632 | 0.065299 | 0.338403 | Yes |
| row_86  | Cit            | CIT            | 4633 | 0.065263 | 0.341423 | Yes |
| row_87  | Cdc20          | CDC20          | 4640 | 0.064957 | 0.344176 | Yes |
| row_88  | Zbed6          | ZBED6          | 4641 | 0.064953 | 0.347182 | Yes |
| row_89  | Pydc4          | PYDC4          | 4700 | 0.063994 | 0.347693 | Yes |
| row_90  | Atr            | ATR            | 4708 | 0.063827 | 0.350351 | Yes |
| row_91  | Ctps           | CTPS           | 4727 | 0.063295 | 0.352520 | Yes |
| row_92  | Casc5          | CASC5          | 4733 | 0.062931 | 0.355221 | Yes |
| row_93  | 9930111J21Rik1 | 9930111J21RIK1 | 4785 | 0.061771 | 0.355924 | Yes |
| row_94  | Tacc3          | TACC3          | 4787 | 0.061675 | 0.358736 | Yes |
| row_95  | Chtf18         | CHTF18         | 4794 | 0.061443 | 0.361327 | Yes |
| row_96  | Aspm           | ASPM           | 4801 | 0.061281 | 0.363909 | Yes |
| row_97  | Tnks           | TNKS           | 4802 | 0.061261 | 0.366744 | Yes |
| row_98  | Bub1           | BUB1           | 4837 | 0.060572 | 0.368111 | Yes |
| row_99  | Gm15800        | GM15800        | 4862 | 0.059947 | 0.369871 | Yes |
| row_100 | Clspn          | CLSPN          | 4864 | 0.059934 | 0.372602 | Yes |
| row_101 | Macf1          | MACF1          | 4865 | 0.059922 | 0.375376 | Yes |

|         |               |               |      |          |          |     |
|---------|---------------|---------------|------|----------|----------|-----|
| row_102 | Brca1         | BRCA1         | 4869 | 0.059813 | 0.378017 | Yes |
| row_103 | Cenpe         | CENPE         | 4885 | 0.059585 | 0.380141 | Yes |
| row_104 | Rtp4          | RTP4          | 4933 | 0.058652 | 0.380869 | Yes |
| row_105 | Ubr4          | UBR4          | 4950 | 0.058459 | 0.382898 | Yes |
| row_106 | Gm4759        | GM4759        | 4953 | 0.058320 | 0.385513 | Yes |
| row_107 | Ctsw          | CTSW          | 4964 | 0.058184 | 0.387783 | Yes |
| row_108 | Hivep3        | HIVEP3        | 4977 | 0.057950 | 0.389958 | Yes |
| row_109 | Kifc1         | KIFC1         | 4996 | 0.057580 | 0.391862 | Yes |
| row_110 | Dhx58         | DHX58         | 5002 | 0.057358 | 0.394306 | Yes |
| row_111 | Vps13d        | VPS13D        | 5004 | 0.057289 | 0.396915 | Yes |
| row_112 | Fn1           | FN1           | 5089 | 0.055289 | 0.395924 | Yes |
| row_113 | Pkd1          | PKD1          | 5103 | 0.054916 | 0.397916 | Yes |
| row_114 | Trrap         | TRRAP         | 5117 | 0.054566 | 0.399892 | Yes |
| row_115 | Dock5         | DOCK5         | 5180 | 0.053063 | 0.399727 | Yes |
| row_116 | Kif18b        | KIF18B        | 5189 | 0.052711 | 0.401829 | Yes |
| row_117 | Samd9l        | SAMD9L        | 5199 | 0.052544 | 0.403880 | Yes |
| row_118 | Cobll1        | COBLL1        | 5203 | 0.052435 | 0.406180 | Yes |
| row_119 | Cad           | CAD           | 5229 | 0.051891 | 0.407525 | Yes |
| row_120 | Helz2         | HELZ2         | 5233 | 0.051803 | 0.409796 | Yes |
| row_121 | Slc20a1       | SLC20A1       | 5235 | 0.051693 | 0.412146 | Yes |
| row_122 | Kif20b        | KIF20B        | 5275 | 0.051033 | 0.412860 | Yes |
| row_123 | Mybl2         | MYBL2         | 5278 | 0.050966 | 0.415134 | Yes |
| row_124 | Ahnak         | AHNAK         | 5286 | 0.050678 | 0.417184 | Yes |
| row_125 | Herc1         | HERC1         | 5321 | 0.049923 | 0.418057 | Yes |
| row_126 | Kmt2a         | KMT2A         | 5324 | 0.049867 | 0.420281 | Yes |
| row_127 | Cdca2         | CDCA2         | 5328 | 0.049733 | 0.422456 | Yes |
| row_128 | Spdl1         | SPDL1         | 5329 | 0.049669 | 0.424754 | Yes |
| row_129 | Smg1          | SMG1          | 5330 | 0.049660 | 0.427053 | Yes |
| row_130 | Herc6         | HERC6         | 5331 | 0.049658 | 0.429351 | Yes |
| row_131 | Htt           | HTT           | 5355 | 0.049108 | 0.430652 | Yes |
| row_132 | Cpt1a         | CPT1A         | 5372 | 0.048899 | 0.432238 | Yes |
| row_133 | Kif11         | KIF11         | 5386 | 0.048684 | 0.433942 | Yes |
| row_134 | Huwe1         | HUWE1         | 5388 | 0.048656 | 0.436152 | Yes |
| row_135 | Mycbp2        | MYCBP2        | 5401 | 0.048588 | 0.437893 | Yes |
| row_136 | Sacs          | SACS          | 5426 | 0.048150 | 0.439108 | Yes |
| row_137 | Nlrc5         | NLRC5         | 5478 | 0.047187 | 0.439136 | Yes |
| row_138 | Diap3         | DIAP3         | 5507 | 0.046613 | 0.440110 | Yes |
| row_139 | Rora          | RORA          | 5517 | 0.046375 | 0.441876 | Yes |
| row_140 | Ifih1         | IFIH1         | 5521 | 0.046255 | 0.443890 | Yes |
| row_141 | Myo5a         | MYO5A         | 5540 | 0.045952 | 0.445256 | Yes |
| row_142 | Atp2b4        | ATP2B4        | 5542 | 0.045916 | 0.447339 | Yes |
| row_143 | Phf11c        | PHF11C        | 5570 | 0.045457 | 0.448302 | Yes |
| row_144 | Spag5         | SPAG5         | 5591 | 0.045309 | 0.449553 | Yes |
| row_145 | Dync1h1       | DYNC1H1       | 5619 | 0.044796 | 0.450485 | Yes |
| row_146 | Endod1        | ENDOD1        | 5620 | 0.044795 | 0.452559 | Yes |
| row_147 | Oas1b         | OAS1B         | 5630 | 0.044538 | 0.454240 | Yes |
| row_148 | Mki67         | MKI67         | 5652 | 0.044397 | 0.455407 | Yes |
| row_149 | A430078G23Rik | A430078G23RIK | 5694 | 0.044271 | 0.455723 | Yes |
| row_150 | Flnb          | FLNB          | 5719 | 0.044101 | 0.456750 | Yes |
| row_151 | Brip1         | BRIP1         | 5723 | 0.044004 | 0.458660 | Yes |
| row_152 | Slnf8         | SLFN8         | 5745 | 0.043662 | 0.459793 | Yes |
| row_153 | Trim30a       | TRIM30A       | 5749 | 0.043584 | 0.461683 | Yes |
| row_154 | Cep350        | CEP350        | 5752 | 0.043543 | 0.463614 | Yes |

|         |          |          |      |          |          |     |
|---------|----------|----------|------|----------|----------|-----|
| row_155 | Itgam    | ITGAM    | 5753 | 0.043521 | 0.465628 | Yes |
| row_156 | Cdca3    | CDCA3    | 5759 | 0.043412 | 0.467426 | Yes |
| row_157 | Oasl1    | OASL1    | 5763 | 0.043341 | 0.469305 | Yes |
| row_158 | E2f8     | E2F8     | 5806 | 0.042724 | 0.469507 | Yes |
| row_159 | Dnah8    | DNAH8    | 5852 | 0.041807 | 0.469540 | Yes |
| row_160 | Irf7     | IRF7     | 5886 | 0.041398 | 0.470062 | Yes |
| row_161 | Slfn5    | SLFN5    | 5906 | 0.041103 | 0.471161 | Yes |
| row_162 | Kmt2d    | KMT2D    | 5908 | 0.041063 | 0.473019 | Yes |
| row_163 | Kif20a   | KIF20A   | 5930 | 0.040685 | 0.474015 | Yes |
| row_164 | Heatr1   | HEATR1   | 5936 | 0.040611 | 0.475683 | Yes |
| row_165 | Chd9     | CHD9     | 5950 | 0.040436 | 0.477005 | Yes |
| row_166 | Ncapd2   | NCAPD2   | 5987 | 0.039829 | 0.477327 | Yes |
| row_167 | Cdk1     | CDK1     | 6004 | 0.039593 | 0.478483 | Yes |
| row_168 | Cenpo    | CENPO    | 6036 | 0.039111 | 0.478983 | Yes |
| row_169 | Rap1gap2 | RAP1GAP2 | 6086 | 0.038333 | 0.478687 | Yes |
| row_170 | Vps13c   | VPS13C   | 6102 | 0.037999 | 0.479811 | Yes |
| row_171 | Fbln1    | FBLN1    | 6141 | 0.037617 | 0.479946 | Yes |
| row_172 | Atp10a   | ATP10A   | 6145 | 0.037598 | 0.481560 | Yes |
| row_173 | Prc1     | PRC1     | 6151 | 0.037536 | 0.483086 | Yes |
| row_174 | Racgap1  | RACGAP1  | 6168 | 0.037267 | 0.484134 | Yes |
| row_175 | Piezo1   | PIEZO1   | 6173 | 0.037046 | 0.485680 | Yes |
| row_176 | Hist1h3f | HIST1H3F | 6202 | 0.036559 | 0.486188 | Yes |
| row_177 | Abl2     | ABL2     | 6230 | 0.036166 | 0.486721 | Yes |
| row_178 | Prkd3    | PRKD3    | 6240 | 0.035854 | 0.488000 | Yes |
| row_179 | Kmt2c    | KMT2C    | 6264 | 0.035548 | 0.488673 | Yes |
| row_180 | Ly6c2    | LY6C2    | 6267 | 0.035462 | 0.490230 | Yes |
| row_181 | Chd8     | CHD8     | 6352 | 0.034930 | 0.488297 | Yes |
| row_182 | Herc2    | HERC2    | 6358 | 0.034878 | 0.489700 | Yes |
| row_183 | Pglyrp1  | PGLYRP1  | 6365 | 0.034763 | 0.491055 | Yes |
| row_184 | Birc6    | BIRC6    | 6393 | 0.034589 | 0.491515 | Yes |
| row_185 | Pml      | PML      | 6418 | 0.034160 | 0.492082 | Yes |
| row_186 | Ipo4     | IPO4     | 6435 | 0.033865 | 0.492973 | Yes |
| row_187 | Ncapg2   | NCAPG2   | 6665 | 0.032874 | 0.484817 | Yes |
| row_188 | Ccnb2    | CCNB2    | 6666 | 0.032870 | 0.486338 | Yes |
| row_189 | Pmf1     | PMF1     | 6699 | 0.032268 | 0.486479 | Yes |
| row_190 | Usp24    | USP24    | 6704 | 0.032191 | 0.487800 | Yes |
| row_191 | Usp48    | USP48    | 6705 | 0.032165 | 0.489288 | Yes |
| row_192 | Atad2    | ATAD2    | 6708 | 0.032119 | 0.490690 | Yes |
| row_193 | Pkd1l3   | PKD1L3   | 6709 | 0.032104 | 0.492176 | Yes |
| row_194 | Oas3     | OAS3     | 6711 | 0.032097 | 0.493619 | Yes |
| row_195 | Morc3    | MORC3    | 6722 | 0.031886 | 0.494672 | Yes |
| row_196 | Pcnt     | PCNT     | 6741 | 0.031651 | 0.495376 | Yes |
| row_197 | Atad5    | ATAD5    | 6745 | 0.031615 | 0.496713 | Yes |
| row_198 | Usp34    | USP34    | 6767 | 0.031221 | 0.497270 | Yes |
| row_199 | Rif1     | RIF1     | 6773 | 0.031141 | 0.498500 | Yes |
| row_200 | Znfx1    | ZNFX1    | 6778 | 0.031073 | 0.499769 | Yes |
| row_201 | Lair1    | LAIR1    | 6785 | 0.030957 | 0.500948 | Yes |
| row_202 | Hist1h3i | HIST1H3I | 6839 | 0.030407 | 0.500116 | Yes |
| row_203 | Dlgap5   | DLGAP5   | 6842 | 0.030334 | 0.501435 | Yes |
| row_204 | Nudt4    | NUDT4    | 6850 | 0.030160 | 0.502535 | Yes |
| row_205 | Zzef1    | ZZEF1    | 6897 | 0.029491 | 0.501956 | Yes |
| row_206 | Atp2a2   | ATP2A2   | 6910 | 0.029291 | 0.502805 | Yes |
| row_207 | Emilin2  | EMILIN2  | 6938 | 0.028791 | 0.502996 | Yes |

|         |         |         |      |          |          |     |
|---------|---------|---------|------|----------|----------|-----|
| row_208 | Il18rap | IL18RAP | 6939 | 0.028783 | 0.504328 | Yes |
| row_209 | Nup214  | NUP214  | 7002 | 0.027872 | 0.502998 | Yes |
| row_210 | Plec    | PLEC    | 7013 | 0.027768 | 0.503861 | Yes |
| row_211 | Tpx2    | TPX2    | 7049 | 0.027379 | 0.503649 | Yes |
| row_212 | Pop1    | POP1    | 7059 | 0.027280 | 0.504531 | Yes |



**Supplementary Table 3****Gene set enrichment analysis. Core enriched genes in *Il6<sup>flox/flox</sup>* (control) primed 2D2 effector T cells.**

The expression profiles (RNA Seq) of antigen specific effector T cells (2D2) primed in an *Il6<sup>flox/flox</sup>* control environment vs an *Il6<sup>ΔDC</sup>* environment were assessed for the enrichment of genes differentially down-regulated in an *Il6<sup>-/-</sup>* environment. Core enriched genes of that gene set in control primed T cells. Analysis was performed with GSEA software v2.2.1 provided by the Broad Institute, Cambridge, USA.

**Supplementary Table 3**

| NAME    | PROBE         | GENE SYMBOL   | RANK IN GENE LIST | RANK METRIC SCORE | RUNNING ES | CORE ENRICHMENT |
|---------|---------------|---------------|-------------------|-------------------|------------|-----------------|
| row_71  | Rhbdd2        | RHBDD2        | 16525             | -0.020296         | -0.522171  | Yes             |
| row_72  | Satb1         | SATB1         | 16604             | -0.021015         | -0.522047  | Yes             |
| row_73  | Rps15a        | RPS15A        | 16612             | -0.021074         | -0.518942  | Yes             |
| row_74  | Ncoa7         | NCOA7         | 16630             | -0.021225         | -0.516231  | Yes             |
| row_75  | Fam117b       | FAM117B       | 16644             | -0.021295         | -0.513342  | Yes             |
| row_76  | Abhd4         | ABHD4         | 16662             | -0.021363         | -0.510608  | Yes             |
| row_77  | Gsn           | GSN           | 16693             | -0.021629         | -0.508376  | Yes             |
| row_78  | Ppapdc2       | PPAPDC2       | 16702             | -0.021702         | -0.505212  | Yes             |
| row_79  | Cxcr5         | CXCR5         | 16799             | -0.022538         | -0.505595  | Yes             |
| row_80  | Jtb           | JTB           | 16868             | -0.023201         | -0.504700  | Yes             |
| row_81  | Ypel3         | YPEL3         | 16934             | -0.023732         | -0.503594  | Yes             |
| row_82  | Rps8          | RPS8          | 16937             | -0.023751         | -0.499848  | Yes             |
| row_83  | 0610031J06Rik | 0610031J06RIK | 16949             | -0.023870         | -0.496460  | Yes             |
| row_84  | Cd82          | CD82          | 17167             | -0.024737         | -0.501552  | Yes             |
| row_85  | Gpr146        | GPR146        | 17199             | -0.025047         | -0.498811  | Yes             |
| row_86  | Tnfrsf18      | TNFRSF18      | 17245             | -0.025535         | -0.496577  | Yes             |
| row_87  | Gpr171        | GPR171        | 17275             | -0.025880         | -0.493618  | Yes             |
| row_88  | Ptms          | PTMS          | 17276             | -0.025883         | -0.489445  | Yes             |
| row_89  | H2-DMA        | H2-DMA        | 17283             | -0.025953         | -0.485511  | Yes             |
| row_90  | Rps3          | RPS3          | 17316             | -0.026265         | -0.482615  | Yes             |
| row_91  | Rps18         | RPS18         | 17359             | -0.026715         | -0.480065  | Yes             |
| row_92  | Rasgrp4       | RASGRP4       | 17360             | -0.026721         | -0.475757  | Yes             |
| row_93  | Rps9          | RPS9          | 17501             | -0.026858         | -0.477285  | Yes             |
| row_94  | Ndufa7        | NDUFA7        | 17536             | -0.027195         | -0.474323  | Yes             |
| row_95  | Adck2         | ADCK2         | 17612             | -0.027956         | -0.472954  | Yes             |
| row_96  | Bambi-ps1     | BAMBI-PS1     | 17617             | -0.028024         | -0.468603  | Yes             |
| row_97  | Atp5l         | ATP5L         | 17639             | -0.028218         | -0.464932  | Yes             |
| row_98  | Gm2a          | GM2A          | 17643             | -0.028269         | -0.460499  | Yes             |
| row_99  | Dedd2         | DEDD2         | 17695             | -0.028851         | -0.457982  | Yes             |
| row_100 | Ypel5         | YPEL5         | 17738             | -0.029534         | -0.454977  | Yes             |
| row_101 | Rps14         | RPS14         | 17776             | -0.029951         | -0.451696  | Yes             |
| row_102 | Tnfrsf9       | TNFRSF9       | 17789             | -0.030053         | -0.447353  | Yes             |
| row_103 | Rapsn         | RAPSN         | 17794             | -0.030108         | -0.442666  | Yes             |
| row_104 | Gimap6        | GIMAP6        | 17886             | -0.031010         | -0.441474  | Yes             |
| row_105 | Rgs10         | RGS10         | 17900             | -0.031181         | -0.436990  | Yes             |
| row_106 | Tnfrsf4       | TNFRSF4       | 17923             | -0.031466         | -0.432838  | Yes             |
| row_107 | Cdkn1b        | CDKN1B        | 17962             | -0.032053         | -0.429260  | Yes             |
| row_108 | Tmem59        | TMEM59        | 18025             | -0.032992         | -0.426535  | Yes             |
| row_109 | Sepp1         | SEPP1         | 18386             | -0.034968         | -0.435962  | Yes             |
| row_110 | Rpl18         | RPL18         | 18400             | -0.035115         | -0.430845  | Yes             |
| row_111 | Gm10560       | GM10560       | 18418             | -0.035406         | -0.425847  | Yes             |
| row_112 | Ergic3        | ERGIC3        | 18487             | -0.036290         | -0.422842  | Yes             |
| row_113 | Smco4         | SMCO4         | 18494             | -0.036344         | -0.417233  | Yes             |
| row_114 | Use1          | USE1          | 18596             | -0.037696         | -0.415381  | Yes             |
| row_115 | Tcaim         | TCAIM         | 18599             | -0.037800         | -0.409370  | Yes             |
| row_116 | Zfand3        | ZFAND3        | 18618             | -0.038141         | -0.403974  | Yes             |
| row_117 | Arl5c         | ARL5C         | 18622             | -0.038198         | -0.397940  | Yes             |
| row_118 | Gpsm3         | GPSM3         | 18624             | -0.038206         | -0.391822  | Yes             |
| row_119 | Ndufa6        | NDUFA6        | 18658             | -0.038879         | -0.386934  | Yes             |

|         |               |               |       |           |           |     |
|---------|---------------|---------------|-------|-----------|-----------|-----|
| row_120 | Isoc2b        | ISOC2B        | 18683 | -0.039304 | -0.381601 | Yes |
| row_121 | Tmem9         | TMEM9         | 18704 | -0.039794 | -0.376022 | Yes |
| row_122 | Ramp3         | RAMP3         | 18741 | -0.040326 | -0.371026 | Yes |
| row_123 | Rps19         | RPS19         | 18798 | -0.041547 | -0.366671 | Yes |
| row_124 | Nudt22        | NUDT22        | 18887 | -0.042885 | -0.363439 | Yes |
| row_125 | Marcks        | MARCKS        | 19122 | -0.045941 | -0.365824 | Yes |
| row_126 | 9030617O03Rik | 9030617O03RIK | 19132 | -0.046123 | -0.358764 | Yes |
| row_127 | 9330020H09Rik | 9330020H09RIK | 19133 | -0.046133 | -0.351325 | Yes |
| row_128 | Cyb5          | CYB5          | 19234 | -0.048395 | -0.347707 | Yes |
| row_129 | Slc41a3       | SLC41A3       | 19314 | -0.049770 | -0.342988 | Yes |
| row_130 | Rab33b        | RAB33B        | 19387 | -0.051223 | -0.337742 | Yes |
| row_131 | Casp6         | CASP6         | 19411 | -0.051660 | -0.330375 | Yes |
| row_132 | Asb2          | ASB2          | 19417 | -0.051855 | -0.322223 | Yes |
| row_133 | Tha1          | THA1          | 19446 | -0.052608 | -0.314912 | Yes |
| row_134 | Gatsl3        | GATSL3        | 19539 | -0.055289 | -0.309848 | Yes |
| row_135 | Tmem42        | TMEM42        | 19613 | -0.057166 | -0.303685 | Yes |
| row_136 | Wls           | WLS           | 19705 | -0.059751 | -0.297859 | Yes |
| row_137 | Bckdha        | BCKDHA        | 19710 | -0.059825 | -0.288381 | Yes |
| row_138 | Nipal1        | NIPAL1        | 19715 | -0.060065 | -0.278863 | Yes |
| row_139 | Hcst          | HCST          | 19737 | -0.060485 | -0.269989 | Yes |
| row_140 | Tmie          | TMIE          | 19954 | -0.065887 | -0.268405 | Yes |
| row_141 | Socs3         | SOCS3         | 20054 | -0.067938 | -0.261594 | Yes |
| row_142 | Igsf23        | IGSF23        | 20095 | -0.069312 | -0.252092 | Yes |
| row_143 | Fam210b       | FAM210B       | 20159 | -0.071209 | -0.243247 | Yes |
| row_144 | Cd8b1         | CD8B1         | 20239 | -0.073876 | -0.234641 | Yes |
| row_145 | 5430417L22Rik | 5430417L22RIK | 20243 | -0.074029 | -0.222830 | Yes |
| row_146 | 6430562O15Rik | 6430562O15RIK | 20252 | -0.074237 | -0.211195 | Yes |
| row_147 | Leng9         | LENG9         | 20326 | -0.076111 | -0.201978 | Yes |
| row_148 | Pim2          | PIM2          | 20358 | -0.077264 | -0.190817 | Yes |
| row_149 | D830046C22Rik | D830046C22RIK | 20399 | -0.078854 | -0.179777 | Yes |
| row_150 | Mpg           | MPG           | 20438 | -0.080643 | -0.168365 | Yes |
| row_151 | Trappc6a      | TRAPPC6A      | 20553 | -0.084217 | -0.159556 | Yes |
| row_152 | Sbk2          | SBK2          | 20697 | -0.089797 | -0.151062 | Yes |
| row_153 | D630039A03Rik | D630039A03RIK | 20711 | -0.090766 | -0.136971 | Yes |
| row_154 | Aldoc         | ALDOC         | 20770 | -0.092894 | -0.124420 | Yes |
| row_155 | Jdp2          | JDP2          | 20912 | -0.098107 | -0.114502 | Yes |
| row_156 | Rab26os       | RAB26OS       | 20959 | -0.101564 | -0.100051 | Yes |
| row_157 | Egln3         | EGLN3         | 21027 | -0.106210 | -0.085729 | Yes |
| row_158 | Arhgef5       | ARHGEF5       | 21113 | -0.111999 | -0.071228 | Yes |
| row_159 | Tm2d3         | TM2D3         | 21192 | -0.116361 | -0.055730 | Yes |
| row_160 | Igf2bp2       | IGF2BP2       | 21260 | -0.121444 | -0.038952 | Yes |
| row_161 | Adora3        | ADORA3        | 21268 | -0.121788 | -0.019608 | Yes |
| row_162 | Gm9895        | GM9895        | 21292 | -0.123223 | -0.000702 | Yes |
| row_163 | Map1lc3a      | MAP1LC3A      | 21299 | -0.123508 | 0.018961  | Yes |
| row_164 | Oaz2          | OAZ2          | 21516 | -0.138739 | 0.032292  | Yes |
| row_165 | Al854703      | Al854703      | 21655 | -0.149172 | 0.050569  | Yes |
| row_166 | Nfasc         | NFASC         | 22985 | -0.310592 | 0.045030  | Yes |

**Supplementary Table 4****Gene set enrichment analysis. Core enrichment of the Stat3 signature in *Il6<sup>fllox/fllox</sup>* (control) primed 2D2 effector T cells.**

The expression profiles (RNA Seq) of antigen specific effector T cells (2D2) primed in an *Il6<sup>fllox/fllox</sup>* control environment vs an *Il6<sup>ΔDC</sup>* environment were assessed for the enrichment of Stat3 signature genes. Core enriched genes of that gene set in control primed T cells. Analysis was performed with GSEA software v2.2.1 provided by the Broad Institute, Cambridge, USA.

Supplementary Table 4

| NAME    | PROBE   | GENE SYMBOL | GENE_TITLE                                                                              | RANK IN GENE LIST | RANK METRIC SCORE | RUNNING ES | CORE ENRICHMENT |
|---------|---------|-------------|-----------------------------------------------------------------------------------------|-------------------|-------------------|------------|-----------------|
| row_145 | SCARF1  | SCARF1      | scavenger receptor class F, member 1                                                    | 20977             | -0.121393         | -0.337553  | Yes             |
| row_146 | LYSMD1  | LYSMD1      | LysM, putative peptidoglycan-binding, domain containing 1                               | 21082             | -0.125743         | -0.337018  | Yes             |
| row_147 | FAM110B | null        | null                                                                                    | 21118             | -0.127738         | -0.333475  | Yes             |
| row_148 | NFE2    | NFE2        | nuclear factor (erythroid-derived 2), 45kDa                                             | 21162             | -0.132303         | -0.330091  | Yes             |
| row_149 | NBEA    | NBEA        | neurobeachin                                                                            | 21268             | -0.141885         | -0.328963  | Yes             |
| row_150 | HOXB5   | HOXB5       | homeobox B5                                                                             | 21330             | -0.147088         | -0.325761  | Yes             |
| row_151 | ADAM22  | ADAM22      | ADAM metallopeptidase domain 22                                                         | 21338             | -0.147300         | -0.320258  | Yes             |
| row_152 | PLSCR4  | PLSCR4      | phospholipid scramblase 4                                                               | 21793             | -0.185391         | -0.332237  | Yes             |
| row_153 | DEPTOR  | null        | null                                                                                    | 21865             | -0.191214         | -0.327723  | Yes             |
| row_154 | MPZL1   | MPZL1       | myelin protein zero-like 1                                                              | 21872             | -0.192041         | -0.320416  | Yes             |
| row_155 | SLC16A9 | SLC16A9     | solute carrier family 16, member 9 (monocarboxylic acid transporter 9)                  | 21933             | -0.198989         | -0.315128  | Yes             |
| row_156 | MYCT1   | MYCT1       | myc target 1                                                                            | 21949             | -0.201676         | -0.307824  | Yes             |
| row_157 | PALLD   | PALLD       | palladin, cytoskeletal associated protein                                               | 22069             | -0.212623         | -0.304505  | Yes             |
| row_158 | TGM2    | TGM2        | transglutaminase 2 (C polypeptide, protein-glutamine-gamma-glutamyltransferase)         | 22084             | -0.214586         | -0.296649  | Yes             |
| row_159 | RND2    | RND2        | Rho family GTPase 2                                                                     | 22107             | -0.218453         | -0.288982  | Yes             |
| row_160 | PBX1    | PBX1        | pre-B-cell leukemia transcription factor 1                                              | 22254             | -0.236844         | -0.285855  | Yes             |
| row_161 | CPNE8   | CPNE8       | copine VIII                                                                             | 22312             | -0.245258         | -0.278618  | Yes             |
| row_162 | GHR     | GHR         | growth hormone receptor                                                                 | 22325             | -0.248167         | -0.269356  | Yes             |
| row_163 | TTLL7   | TTLL7       | tubulin tyrosine ligase-like family, member 7                                           | 22337             | -0.250673         | -0.259952  | Yes             |
| row_164 | RASSF6  | RASSF6      | Ras association (RalGDS/AF-6) domain family 6                                           | 22341             | -0.251769         | -0.250166  | Yes             |
| row_165 | CPA3    | CPA3        | carboxypeptidase A3 (mast cell)                                                         | 22453             | -0.272366         | -0.244155  | Yes             |
| row_166 | MYCN    | MYCN        | v-myc myelocytomatosis viral related oncogene, neuroblastoma derived (avian)            | 22511             | -0.284290         | -0.235381  | Yes             |
| row_167 | SPIN4   | null        | null                                                                                    | 22575             | -0.293415         | -0.226502  | Yes             |
| row_168 | GULP1   | GULP1       | GULP, engulfment adaptor PTB domain containing 1                                        | 22636             | -0.302397         | -0.217143  | Yes             |
| row_169 | UPP1    | UPP1        | uridine phosphorylase 1                                                                 | 22668             | -0.309679         | -0.206265  | Yes             |
| row_170 | CADM1   | null        | null                                                                                    | 22750             | -0.323547         | -0.196965  | Yes             |
| row_171 | UBE2E2  | UBE2E2      | ubiquitin-conjugating enzyme E2E 2 (UBC4/5 homolog, yeast)                              | 22804             | -0.332345         | -0.186129  | Yes             |
| row_172 | ZFP2    | ZFP2        | zinc finger protein 2 homolog (mouse)                                                   | 22817             | -0.335075         | -0.173444  | Yes             |
| row_173 | MYOM1   | MYOM1       | myomesin 1 (skelemin) 185kDa                                                            | 22853             | -0.344985         | -0.161346  | Yes             |
| row_174 | MMRN1   | MMRN1       | multimerin 1                                                                            | 22863             | -0.347998         | -0.148025  | Yes             |
| row_175 | FHL1    | FHL1        | four and a half LIM domains 1                                                           | 22874             | -0.351493         | -0.134609  | Yes             |
| row_176 | TEK     | TEK         | TEK tyrosine kinase, endothelial (venous malformations, multiple cutaneous and mucosal) | 22901             | -0.357859         | -0.121622  | Yes             |
| row_177 | BGN     | BGN         | biglycan                                                                                | 22910             | -0.361577         | -0.107724  | Yes             |
| row_178 | PKIA    | PKIA        | protein kinase (cAMP-dependent, catalytic) inhibitor alpha                              | 23159             | -0.439891         | -0.100934  | Yes             |
| row_179 | PABPC4L | PABPC4L     | poly(A) binding protein, cytoplasmic 4-like                                             | 23238             | -0.474253         | -0.085572  | Yes             |
| row_180 | MAMDC2  | MAMDC2      | MAM domain containing 2                                                                 | 23249             | -0.480763         | -0.067065  | Yes             |
| row_181 | PTPLAD2 | PTPLAD2     | protein tyrosine phosphatase-like A domain containing 2                                 | 23437             | -0.584523         | -0.051990  | Yes             |
| row_182 | SGCE    | SGCE        | sarcoglycan, epsilon                                                                    | 23460             | -0.601615         | -0.029234  | Yes             |
| row_183 | TMEM40  | TMEM40      | transmembrane protein 40                                                                | 23688             | -1.034674         | 0.001868   | Yes             |
